# Supplementary material
Source: publisher figshare collection journal article supplement (https://gsapubs.figshare.com/ndownloader/files/34436702)
Supplement: Supplementary file 1 [file 34436702]

## Sheet: Sample & Standards
reactor.ID	IPL.num	Type.1	Type.2	sample.ID	Date.Time	IPL.ID	Name.full	primes	d33	d33.err	d34	d34.err	d35	d35.err	d36	d36.err	flag	reactor.segment	dp17O.SMOWSLAP	dp18O.SMOWSLAP	D17O.SMOWSLAP	D17O.SMOWSLAP.per.meg	dp17O.SMOWSLAP.CO2norm	dp18O.SMOWSLAP.CO2norm	D17O.SMOWSLAP.per.meg.carbNorm	dp17O.SMOWSLAP.CO2norm.type	dp18O.SMOWSLAP.CO2norm.type	D17O.SMOWSLAP.per.meg.carbNorm.type
13	1925	WaterStd	House DI	House DI	2019-11-21 11:32:52	IPL-17O-1925	Data_1928 IPL-17O-1925 House DI#1-R13-1	1	-13.1683	0.00832401	-25.4571	0.00240644	-37.2126	0.160769	2879.32	0.801292	0	1	-3.17142	-6.06149	0.0290477	29.0477	-3.17142	-6.06149	29.0477	no correction	no correction	no correction
13	1927	WaterStd	House DI	House DI	2019-11-21 14:32:31	IPL-17O-1927	Data_1929 IPL-17O-1927 House DI#1-R13-3	0	-13.2724	0.00424107	-25.6243	0.00150271	-37.5026	0.149028	2150.69	0.342011	0	1	-3.28518	-6.24635	0.0128892	12.8892	-3.28518	-6.24635	12.8892	no correction	no correction	no correction
13	1928	WaterStd	House DI	House DI	2019-11-21 16:32:49	IPL-17O-1928	Data_1930 IPL-17O-1928 House DI 1-R13-4	0	-13.1237	0.00423732	-25.3438	0.00135119	-37.7977	0.164936	2701.91	0.326818	0	1	-3.12377	-5.93821	0.0116033	11.6032	-3.12377	-5.93821	11.6032	no correction	no correction	no correction
13	1929	WaterStd	House DI	House DI	2019-11-22 12:08:04	IPL-17O-1929	Data_1931 IPL-17O-1929 House DI 1-R13-5	1	-13.5129	0.00354837	-26.0957	0.00165067	-38.8355	0.143057	1257.58	0.350212	0	1	-3.5502	-6.77142	0.0251109	25.1109	-3.5502	-6.77142	25.1109	no correction	no correction	no correction
13	1930	WaterStd	House DI	House DI	2019-11-22 14:10:54	IPL-17O-1930	Data_1932 IPL-17O-1930 House DI 1-R13-6	0	-13.2992	0.00420622	-25.6849	0.00155785	-38.6596	0.133381	2218.93	0.155631	0	1	-3.31813	-6.31975	0.018705	18.705	-3.31813	-6.31975	18.705	no correction	no correction	no correction
13	1931	WaterStd	House DI	House DI	2019-11-22 16:16:29	IPL-17O-1931	Data_1933 IPL-17O-1931 House DI 1-R13-7	0	-13.404	0.00429873	-25.8643	0.00161432	-38.723	0.155253	1938.09	0.283686	0	1	-3.43246	-6.51782	0.00894743	8.94743	-3.43246	-6.51782	8.94743	no correction	no correction	no correction
13	1932	WaterStd	House DI	House DI	2019-11-22 18:15:52	IPL-17O-1932	Data_1934 IPL-17O-1932 House DI 1-R13-8	0	-13.4943	0.00324042	-26.0488	0.00143383	-39.2541	0.135226	1520.21	0.236383	0	1	-3.53096	-6.72156	0.0180235	18.0235	-3.53096	-6.72156	18.0235	no correction	no correction	no correction
13	1933	WaterStd	SLAP	SLAP	2019-11-23 12:58:08	IPL-17O-1933	Data_1935 IPL-17O-1933 SLAP2-B5-R13-1	2	-37.5397	0.00460477	-70.4603	0.0063065	-100.576	0.150919	1299.9	0.43839	0	1	-30.0411	-56.8646	-0.0166259	-16.6259	-30.0411	-56.8646	-16.6259	no correction	no correction	no correction
13	1934	WaterStd	SLAP	SLAP	2019-11-23 15:04:16	IPL-17O-1934	Data_1936 IPL-17O-1934 SLAP2-B5-R13-2	0	-37.2297	0.00500162	-69.8846	0.00224647	-101.565	0.156292	1594.05	0.297344	0	1	-29.6953	-56.1988	-0.0223142	-22.3142	-29.6953	-56.1988	-22.3142	no correction	no correction	no correction
13	1935	WaterStd	SLAP	SLAP	2019-11-23 17:14:07	IPL-17O-1935	Data_1937 IPL-17O-1935 SLAP2-B5-R13-3	0	-37.53	0.00384204	-70.4446	0.00158531	-102.553	0.121878	1386.96	0.234637	0	1	-30.0311	-56.8475	-0.0155609	-15.5609	-30.0311	-56.8475	-15.5609	no correction	no correction	no correction
13	1938	WaterStd	SMOW	SMOW	2019-11-24 15:33:18	IPL-17O-1938	Data_1939 IPL-17O-1938 VSMOW2-B3-R13-3	1	-10.2079	0.00337335	-19.8601	0.00156378	-30.7582	0.14044	1428.92	0.229262	0	1	0.0305971	0.0568548	0.000577799	0.577799	0.0305971	0.0568548	0.577799	no correction	no correction	no correction
13	1939	WaterStd	SMOW	SMOW	2019-11-24 17:42:38	IPL-17O-1939	Data_1940 IPL-17O-1939 VSMOW2-B3-R13-4	0	-10.2237	0.00306796	-19.8896	0.00128384	-30.9933	0.173399	1856.21	0.163403	0	1	0.0130942	0.0240493	0.000396208	0.396208	0.0130942	0.0240493	0.396208	no correction	no correction	no correction
13	1940	WaterStd	SMOW	SMOW	2019-11-25 09:32:42	IPL-17O-1940	Data_1941 IPL-17O-1940 VSMOW2-B3-R13-5	1	-10.2753	0.00469202	-19.9843	0.00212703	-31.671	0.156455	1657.06	0.395475	0	1	-0.045324	-0.0840441	-0.000948767	-0.948767	-0.045324	-0.0840441	-0.948767	no correction	no correction	no correction
13	1942	CarbonateStd	102-GC-AZ01	102-GC-AZ01	2019-11-26 09:12:46	IPL-17O-1942	Data_1943 IPL-17O-1942 102-GC-AZ01-R13-2	0	0.120576	0.00362627	-0.176755	0.00136814	-3.73807	0.155884	1074.95	0.346723	0	1	11.158	21.3433	-0.111286	-111.286	7.7872	14.8628	-60.3335	secondary correction applied	secondary correction applied	mineral + 1-pt normalization applied to D17O for data.cor[[5]] using IAEA-603 and/or IAEA-C1 as calcite. Offset=5.29 per meg
13	1944	CarbonateStd	IAEA-C1	IAEA-C1	2019-11-26 15:21:13	IPL-17O-1944	Data_1945 IPL-17O-1944 IAEA-C1-R13-2	0	7.45407	0.00360287	13.8595	0.00134917	16.9756	0.145601	754.683	0.112535	0	1	18.9879	36.257	-0.155781	-155.781	15.5714	29.6897	-104.828	secondary correction applied	secondary correction applied	mineral + 1-pt normalization applied to D17O for data.cor[[5]] using IAEA-603 and/or IAEA-C1 as calcite. Offset=5.29 per meg
13	1945	CarbonateStd	IAEA-C1	IAEA-C1	2019-11-27 09:48:37	IPL-17O-1945	Data_1946 IPL-17O-1945 IAEA-C1-R13-3	0	5.95318	0.00365336	11.0044	0.00185359	11.8673	0.128427	1121.73	0.339009	0	1	17.3872	33.2359	-0.161321	-161.321	13.9799	26.6862	-110.368	secondary correction applied	secondary correction applied	mineral + 1-pt normalization applied to D17O for data.cor[[5]] using IAEA-603 and/or IAEA-C1 as calcite. Offset=5.29 per meg
13	1946	CarbonateStd	IAEA-C1	IAEA-C1	2019-11-27 12:16:04	IPL-17O-1946	Data_1947 IPL-17O-1946 IAEA-C1-R13-4	0	6.59852	0.00380226	12.2162	0.00154275	14.3998	0.122124	938.942	0.131037	0	1	18.0741	34.5163	-0.150511	-150.512	14.6629	27.9592	-99.5588	secondary correction applied	secondary correction applied	mineral + 1-pt normalization applied to D17O for data.cor[[5]] using IAEA-603 and/or IAEA-C1 as calcite. Offset=5.29 per meg
13	1948	CarbonateStd	102-GC-AZ01	102-GC-AZ01	2019-11-27 17:34:31	IPL-17O-1948	Data_1949 IPL-17O-1948 102-GC-AZ01-R13-4	0	0.594194	0.00314475	0.752275	0.00106949	-0.0197458	0.138447	925.071	0.103779	0	1	11.6604	22.3283	-0.128947	-128.947	8.28657	15.842	-77.9944	secondary correction applied	secondary correction applied	mineral + 1-pt normalization applied to D17O for data.cor[[5]] using IAEA-603 and/or IAEA-C1 as calcite. Offset=5.29 per meg
13	1950	CarbonateStd	GON06-OES	GON06-OES	2019-11-29 18:23:27	IPL-17O-1950	Data_1951 IPL-17O-1950 GON06-OES-R13-2	0	10.4053	0.00332536	19.727	0.00250609	26.2409	0.177932	1469.16	0.56593	0	1	22.11	42.4055	-0.280092	-280.092	18.6746	35.8025	-229.139	secondary correction applied	secondary correction applied	mineral + 1-pt normalization applied to D17O for data.cor[[5]] using IAEA-603 and/or IAEA-C1 as calcite. Offset=5.29 per meg
13	1951	CarbonateStd	GON06-OES	GON06-OES	2019-11-29 20:49:34	IPL-17O-1951	Data_1952 IPL-17O-1951 GON09-OES-R13-3	0	11.3649	0.00410658	21.5441	0.00141433	29.7058	0.134769	1663.75	0.156118	0	1	23.1266	44.3078	-0.267942	-267.942	19.6853	37.6937	-216.99	secondary correction applied	secondary correction applied	mineral + 1-pt normalization applied to D17O for data.cor[[5]] using IAEA-603 and/or IAEA-C1 as calcite. Offset=5.29 per meg
13	1952	CarbonateStd	GON06-OES	GON06-OES	2019-11-30 19:24:22	IPL-17O-1952	Data_1953 IPL-17O-1952 GON06-OES-R13-4	0	10.7658	0.00400323	20.4118	0.00290325	26.7936	0.180242	1606.77	0.564971	0	1	22.4882	43.116	-0.277071	-277.071	19.0506	36.5088	-226.118	secondary correction applied	secondary correction applied	mineral + 1-pt normalization applied to D17O for data.cor[[5]] using IAEA-603 and/or IAEA-C1 as calcite. Offset=5.29 per meg
13	1954	CarbonateStd	ETH-2	ETH-2	2019-12-01 17:07:34	IPL-17O-1954	Data_1955 IPL-17O-1954 ETH-2-R13-2	0	-1.87663	0.00426775	-4.01799	0.00128674	-8.35154	0.148386	1119.23	0.390793	0	1	8.99406	17.1861	-0.0801994	-80.1994	5.63604	10.7297	-29.2467	secondary correction applied	secondary correction applied	mineral + 1-pt normalization applied to D17O for data.cor[[5]] using IAEA-603 and/or IAEA-C1 as calcite. Offset=5.29 per meg
13	1955	CarbonateStd	ETH-2	ETH-2	2019-12-01 19:22:58	IPL-17O-1955	Data_1956 IPL-17O-1955 ETH-2-R13-3	0	-1.23569	0.00408182	-2.80969	0.00128898	-6.08474	0.155343	1132.5	0.1699	0	1	9.68204	18.4836	-0.0772873	-77.2873	6.32003	12.0196	-26.3346	secondary correction applied	secondary correction applied	mineral + 1-pt normalization applied to D17O for data.cor[[5]] using IAEA-603 and/or IAEA-C1 as calcite. Offset=5.29 per meg
13	1956	CarbonateStd	ETH-2	ETH-2	2019-12-02 09:40:45	IPL-17O-1956	Data_1957 IPL-17O-1956 ETH-2-R13-4	0	-1.63187	0.00432461	-3.54796	0.00141586	-7.9783	0.129933	1896.75	0.389993	0	1	9.25432	17.6866	-0.0841963	-84.1963	5.89476	11.2273	-33.2436	secondary correction applied	secondary correction applied	mineral + 1-pt normalization applied to D17O for data.cor[[5]] using IAEA-603 and/or IAEA-C1 as calcite. Offset=5.29 per meg
13	1964	CarbonateStd	IAEA-C1	IAEA-C1	2019-12-03 17:11:32	IPL-17O-1964	Data_1965 IPL-17O-1964 IAEA-C1-R13-6	0	6.78373	0.0040055	12.541	0.00187109	15.4126	0.144613	1572.22	0.145654	0	1	18.2473	34.8173	-0.136198	-136.198	14.8352	28.2584	-85.2455	secondary correction applied	secondary correction applied	mineral + 1-pt normalization applied to D17O for data.cor[[5]] using IAEA-603 and/or IAEA-C1 as calcite. Offset=5.29 per meg
13	1966	CarbonateStd	102-GC-AZ01	102-GC-AZ01	2019-12-04 09:50:35	IPL-17O-1966	Data_1967 IPL-17O-1966 102-GC-AZ01-R13-6	0	0.430187	0.00377186	0.413427	0.00154941	-3.59686	0.145704	1781.62	0.346949	0	1	11.4588	21.9203	-0.115087	-115.087	8.08629	15.4364	-64.1347	secondary correction applied	secondary correction applied	mineral + 1-pt normalization applied to D17O for data.cor[[5]] using IAEA-603 and/or IAEA-C1 as calcite. Offset=5.29 per meg
13	1975	CarbonateStd	102-GC-AZ01	102-GC-AZ01	2019-12-08 20:35:10	IPL-17O-1975	Data_1976 IPL-17O-1975 102-GC-AZ01-R13-8	0	0.928786	0.00389967	1.3576	0.00147306	0.616714	0.149594	1259.17	0.470893	0	1	11.9759	22.8998	-0.115205	-115.205	8.6003	16.4101	-64.2521	secondary correction applied	secondary correction applied	mineral + 1-pt normalization applied to D17O for data.cor[[5]] using IAEA-603 and/or IAEA-C1 as calcite. Offset=5.29 per meg
13	1997	WaterStd	SMOW	SMOW	2019-12-16 09:25:01	IPL-17O-1997	Data_1997 IPL-17O-1997 VSMOW2-B4-R13-1	2	-10.1547	0.00405305	-19.7546	0.00182014	-29.4608	0.132704	2403.7	0.428984	0	1	0.00423824	0.0239971	-0.00843225	-8.43225	0.00423824	0.0239971	-8.43225	no correction	no correction	no correction
13	1998	WaterStd	SMOW	SMOW	2019-12-16 11:25:29	IPL-17O-1998	Data_1998 IPL-17O-1998 VSMOW2-B4-R13-2	0	-10.1479	0.00467314	-19.7607	0.00139846	-29.9809	0.127475	2428.57	0.318236	0	1	0.0112956	0.0168245	0.00241228	2.41228	0.0112956	0.0168245	2.41228	no correction	no correction	no correction
13	1999	WaterStd	SMOW	SMOW	2019-12-16 13:21:42	IPL-17O-1999	Data_1999 IPL-17O-1999 VSMOW2-B4-R13-3	0	-10.1554	0.00342031	-19.7807	0.00164302	-30.5137	0.138611	2284.29	0.242253	0	1	0.00287567	-0.00564496	0.00585621	5.85621	0.00287567	-0.00564496	5.85621	no correction	no correction	no correction
13	2000	WaterStd	SMOW	SMOW	2019-12-16 15:16:03	IPL-17O-2000	Data_2000 IPL-17O-2000 VSMOW2-B4-R13-4	0	-10.1732	0.0036435	-19.8044	0.00139177	-30.9089	0.103305	2439.56	0.235162	0	1	-0.0167786	-0.032043	0.0001401	0.1401	-0.0167786	-0.032043	0.1401	no correction	no correction	no correction
13	2001	WaterStd	SLAP	SLAP	2019-12-17 08:37:08	IPL-17O-2001	Data_2001 IPL-17O-2001 SLAP2-B5-R13-4	2	-37.6864	0.00618952	-70.7558	0.00420834	-103.962	0.132929	2409.48	0.432092	0	1	-30.2974	-57.3696	-0.00617363	-6.17363	-30.2974	-57.3696	-6.17363	no correction	no correction	no correction
13	2002	WaterStd	SLAP	SLAP	2019-12-17 10:44:58	IPL-17O-2002	Data_2002 IPL-17O-2002 SLAP2-B5-R13-5	0	-37.3455	0.00450439	-70.1202	0.00212623	-103.104	0.158605	2714.21	0.330709	0	1	-29.9168	-56.6345	-0.0137942	-13.7942	-29.9168	-56.6345	-13.7942	no correction	no correction	no correction
13	2003	WaterStd	SLAP	SLAP	2019-12-17 12:38:43	IPL-17O-2003	Data_2003 IPL-17O-2003 SLAP2-B5-R13-6	0	-37.882	0.0040227	-71.1089	0.00238135	-105.19	0.156948	2102.55	0.192645	0	1	-30.5165	-57.7799	-0.00875294	-8.75294	-30.5165	-57.7799	-8.75294	no correction	no correction	no correction
13	2004	WaterStd	SLAP	SLAP	2019-12-17 14:36:10	IPL-17O-2004	Data_2004 IPL-17O-2004 SLAP2-B5-R13-7	0	-37.9736	0.00543721	-71.3013	0.00184491	-105.407	0.148782	2056.87	0.196261	0	1	-30.6193	-58.0034	0.00655009	6.55009	-30.6193	-58.0034	6.55009	no correction	no correction	no correction
13	2011	CarbonateStd	102-GC-AZ01	102-GC-AZ01	2019-12-18 12:35:09	IPL-17O-2010	Data_2011 IPL-17O-2010 102-GC-AZ01-R13-12	0	0.954636	0.00353288	1.43651	0.00134619	-0.939692	0.134814	2512.57	0.375428	0	1	11.9662	22.9183	-0.134629	-134.629	8.59061	16.4286	-83.6766	secondary correction applied	secondary correction applied	mineral + 1-pt normalization applied to D17O for data.cor[[5]] using IAEA-603 and/or IAEA-C1 as calcite. Offset=5.29 per meg
13	2012	CarbonateStd	102-GC-AZ01	102-GC-AZ01	2019-12-18 15:09:54	IPL-17O-2011	Data_2012 IPL-17O-2011 102-GC-AZ01-R13-13	0	0.96648	0.00420492	1.42566	0.00124354	-1.18182	0.132036	2578.59	0.360386	0	1	11.9785	22.906	-0.115852	-115.852	8.60292	16.4163	-64.8996	secondary correction applied	secondary correction applied	mineral + 1-pt normalization applied to D17O for data.cor[[5]] using IAEA-603 and/or IAEA-C1 as calcite. Offset=5.29 per meg
13	2013	CarbonateStd	102-GC-AZ01	102-GC-AZ01	2019-12-18 17:50:18	IPL-17O-2012	Data_2013 IPL-17O-2012 102-GC-AZ01-R13-14	0	1.05767	0.00434872	1.58837	0.00139774	-0.86114	0.165045	3330.65	0.488656	0	1	12.0757	23.0791	-0.110028	-110.028	8.69962	16.5884	-59.0755	secondary correction applied	secondary correction applied	mineral + 1-pt normalization applied to D17O for data.cor[[5]] using IAEA-603 and/or IAEA-C1 as calcite. Offset=5.29 per meg
13	2014	CarbonateStd	102-GC-AZ01	102-GC-AZ01	2019-12-18 20:19:49	IPL-17O-2013	Data_2014 IPL-17O-2013 102-GC-AZ01-R13-15	0	0.984425	0.0109891	1.4584	0.00411441	-1.44275	0.226335	3603.75	0.34292	0	1	11.9969	22.9395	-0.115167	-115.167	8.6212	16.4496	-64.2142	secondary correction applied	secondary correction applied	mineral + 1-pt normalization applied to D17O for data.cor[[5]] using IAEA-603 and/or IAEA-C1 as calcite. Offset=5.29 per meg
13	2015	WaterStd	SMOW	SMOW	2019-12-20 06:51:11	IPL-17O-2014	Data_2015 IPL-17O-2014 VSMOW2-B4-R13-5	2	-10.1473	0.00432522	-19.7794	0.00233489	-8.43396	0.180844	NA	NA	0	2	0.253588	0.470114	0.0053672	5.36721	0.253588	0.470114	5.36721	no correction	no correction	no correction
13	2016	WaterStd	SMOW	SMOW	2019-12-20 08:44:56	IPL-17O-2015	Data_2016 IPL-17O-2015 VSMOW2-B4-R13-6	0	-10.1007	0.00371767	-19.694	0.00162824	-11.6507	0.124584	NA	NA	0	2	0.304403	0.563927	0.00664947	6.64947	0.304403	0.563927	6.64947	no correction	no correction	no correction
13	2017	WaterStd	SMOW	SMOW	2019-12-20 10:38:35	IPL-17O-2016	Data_2017 IPL-17O-2016 VSMOW2-B4-R13-7	0	-10.1679	0.00474207	-19.8066	0.00124405	-14.0819	0.118026	2063.81	2.99819	0	2	0.23033	0.438399	-0.00114479	-1.14479	0.23033	0.438399	-1.14479	no correction	no correction	no correction
13	2018	WaterStd	SMOW	SMOW	2019-12-20 12:33:11	IPL-17O-2017	Data_2018 IPL-17O-2017 VSMOW2-B4-R13-8	0	-10.2368	0.00438276	-19.9266	0.00176115	-15.6112	0.10016	2065.53	2.05609	0	2	0.154276	0.304723	-0.00661775	-6.61775	0.154276	0.304723	-6.61775	no correction	no correction	no correction
13	2019	WaterStd	SLAP	SLAP	2019-12-20 15:33:56	IPL-17O-2018	Data_2019 IPL-17O-2018 SLAP2-B5-R13-8	2	-36.9853	0.00378226	-69.5088	0.00225533	-57.2561	0.179749	2832.73	1.06486	0	2	-29.6639	-56.1851	0.00180797	1.80797	-29.6639	-56.1851	1.80797	no correction	no correction	no correction
13	2020	WaterStd	SLAP	SLAP	2019-12-20 20:53:52	IPL-17O-2019	Data_2020 IPL-17O-2019 SLAP2-B5-R13-9	0	-36.5137	0.00332487	-68.6109	0.00197048	-67.1957	0.212154	3056.67	1.34938	0	2	-29.1314	-55.1354	-0.0198806	-19.8806	-29.1314	-55.1354	-19.8806	no correction	no correction	no correction
13	2021	WaterStd	SLAP	SLAP	2019-12-21 08:04:20	IPL-17O-2020	Data_2021 IPL-17O-2020 SLAP2-B5-R13-10	2	-37.7595	0.0048711	-70.9142	0.00423538	-71.0385	0.37564	2521.43	2.71693	0	2	-30.5433	-57.8403	-0.0036446	-3.6446	-30.5433	-57.8403	-3.6446	no correction	no correction	no correction
13	2022	WaterStd	SLAP	SLAP	2019-12-21 09:57:04	IPL-17O-2021	Data_2022 IPL-17O-2021 SLAP2-B5-R13-11	0	-37.5062	0.00984328	-70.4212	0.00185431	-77.7505	0.195957	2780.86	0.953934	0	2	-30.2568	-57.2624	-0.0222828	-22.2828	-30.2568	-57.2624	-22.2828	no correction	no correction	no correction
13	2026	CarbonateStd	IAEA-C1	IAEA-C1	2019-12-22 14:01:41	IPL-17O-2025	Data_2026 IPL-17O-2025 IAEA-C1-R13-10	0	6.16745	0.00445058	11.3928	0.0016387	11.3888	0.10655	2239.76	0.37089	0	2	18.0013	34.3899	-0.156564	-156.564	14.2949	27.2974	-118.16	secondary correction applied	secondary correction applied	mineral + 1-pt normalization applied to D17O for data.cor[[6]] using IAEA-603 and/or IAEA-C1 as calcite. Offset=-7.26 per meg
13	2030	CarbonateStd	102-GC-AZ01	102-GC-AZ01	2020-01-02 17:27:19	IPL-17O-2029	Data_2030 IPL-17O-2029 102-GC-AZ01-R13-19	0	1.16288	0.00466369	1.77726	0.00156506	-0.475249	0.151791	1829.27	0.359779	0	2	12.5383	23.9364	-0.100124	-100.124	8.90601	16.9843	-61.7207	secondary correction applied	secondary correction applied	mineral + 1-pt normalization applied to D17O for data.cor[[6]] using IAEA-603 and/or IAEA-C1 as calcite. Offset=-7.26 per meg
13	2045	CarbonateStd	IAEA-C1	IAEA-C1	2020-01-09 08:59:52	IPL-17O-2045	Data_2046 IPL-17O-2045 IAEA-C1-R13-14	0	6.35634	0.00400821	11.7663	0.00168507	12.6234	0.15298	1576.44	0.598587	0	2	18.1265	34.6205	-0.153157	-153.157	14.4184	27.525	-114.754	secondary correction applied	secondary correction applied	mineral + 1-pt normalization applied to D17O for data.cor[[6]] using IAEA-603 and/or IAEA-C1 as calcite. Offset=-7.26 per meg
13	2047	CarbonateStd	102-GC-AZ01	102-GC-AZ01	2020-01-09 13:57:47	IPL-17O-2047	Data_2048 IPL-17O-2047 102-GC-AZ01-R13-21	0	0.711272	0.0039121	0.91076	0.00129435	-2.83352	0.145094	2823	0.458965	0	2	12.018	22.9334	-0.0908301	-90.8301	8.39286	15.9948	-52.4265	secondary correction applied	secondary correction applied	mineral + 1-pt normalization applied to D17O for data.cor[[6]] using IAEA-603 and/or IAEA-C1 as calcite. Offset=-7.26 per meg
13	2050	CarbonateStd	102-GC-AZ01	102-GC-AZ01	2020-01-10 16:18:54	IPL-17O-2050	Data_2051 IPL-17O-2050 102-GC-AZ01-R13-23	0	0.722662	0.00351019	0.966367	0.00133516	-0.571354	0.129937	988.948	0.332925	0	2	12.0255	22.9831	-0.109594	-109.594	8.40001	16.0439	-71.1905	secondary correction applied	secondary correction applied	mineral + 1-pt normalization applied to D17O for data.cor[[6]] using IAEA-603 and/or IAEA-C1 as calcite. Offset=-7.26 per meg
13	2063	CarbonateStd	102-GC-AZ01	102-GC-AZ01	2020-01-15 15:39:59	IPL-17O-2063	Data_2063 IPL-17O-2063 102-GC-AZ01-R13-24	0	1.35797	0.00449002	2.16258	0.00156162	-0.445737	0.120898	1124.12	0.326822	0	2	12.6928	24.2301	-0.100749	-100.749	9.05842	17.2742	-62.3448	secondary correction applied	secondary correction applied	mineral + 1-pt normalization applied to D17O for data.cor[[6]] using IAEA-603 and/or IAEA-C1 as calcite. Offset=-7.26 per meg
13	2064	CarbonateStd	102-GC-AZ01	102-GC-AZ01	2020-01-16 09:10:31	IPL-17O-2064	Data_2064 IPL-17O-2064 102-GC-AZ01-R13-25	0	0.667736	0.00315689	0.856291	0.00151281	-3.16707	0.140958	1517.06	0.475439	0	2	11.9407	22.8097	-0.102829	-102.829	8.31644	15.8728	-64.4258	secondary correction applied	secondary correction applied	mineral + 1-pt normalization applied to D17O for data.cor[[6]] using IAEA-603 and/or IAEA-C1 as calcite. Offset=-7.26 per meg
13	2066	CarbonateStd	IAEA-C1	IAEA-C1	2020-01-16 14:20:35	IPL-17O-2066	Data_2066 IPL-17O-2066 IAEA-C1-R13-16	0	6.63611	0.00423684	12.2559	0.00126182	15.4871	0.127937	3159.45	0.387478	0	2	18.3963	35.0757	-0.123669	-123.669	14.685	27.9741	-85.2657	secondary correction applied	secondary correction applied	mineral + 1-pt normalization applied to D17O for data.cor[[6]] using IAEA-603 and/or IAEA-C1 as calcite. Offset=-7.26 per meg
13	2067	WaterStd	SLAP	SLAP	2020-01-16 16:19:59	IPL-17O-2067	Data_2067 IPL-17O-2067 SLAP2-B5-R13-12	2	-36.7611	0.00425265	-68.999	0.0015054	-99.3352	0.136356	1801.96	0.181444	0	2	-29.53	-55.8466	-0.0430014	-43.0014	-29.53	-55.8466	-43.0014	no correction	no correction	no correction
13	2068	WaterStd	SLAP	SLAP	2020-01-16 18:14:37	IPL-17O-2069	Data_2068 IPL-17O-2069 SLAP2-B5-R13-13	0	-36.9217	0.00413074	-69.3272	0.00154231	-100.018	0.145071	2295.26	0.274798	0	2	-29.7121	-56.2318	-0.0217025	-21.7025	-29.7121	-56.2318	-21.7025	no correction	no correction	no correction
13	2069	WaterStd	SLAP	SLAP	2020-01-16 20:11:28	IPL-17O-2069	Data_2069 IPL-17O-2069 SLAP2-B5-R13-14	0	-37.5459	0.00349055	-70.4815	0.00119171	-101.184	0.162902	1912.23	0.355046	0	2	-30.419	-57.5863	-0.0134577	-13.4577	-30.419	-57.5863	-13.4577	no correction	no correction	no correction
13	2070	WaterStd	SLAP	SLAP	2020-01-17 08:10:13	IPL-17O-2070	Data_2070 IPL-17O-2070 SLAP2-B5-R13-15	2	-37.5847	0.0055499	-70.5664	0.00507575	-101.647	0.150223	2661.24	0.413517	0	2	-30.4651	-57.6906	-0.00447782	-4.47782	-30.4651	-57.6906	-4.47782	no correction	no correction	no correction
13	2071	WaterStd	SLAP	SLAP	2020-01-17 10:10:53	IPL-17O-2071	Data_2071 IPL-17O-2071 SLAP2-B5-R13-16	0	-37.7701	0.00370641	-70.882	0.00150345	-101.147	0.174013	2336.64	0.475238	0	2	-30.6754	-58.0618	-0.0187781	-18.7781	-30.6754	-58.0618	-18.7781	no correction	no correction	no correction
13	2072	WaterStd	SMOW	SMOW	2020-01-17 12:04:12	IPL-17O-2072	Data_2072 IPL-17O-2072 VSMOW2-B4-R13-9	2	-10.9669	0.00458527	-21.2888	0.00143816	-32.5953	0.1286	2359.91	0.302645	0	2	-0.771692	-1.47193	0.00548834	5.48834	-0.771692	-1.47193	5.48834	no correction	no correction	no correction
13	2073	WaterStd	SMOW	SMOW	2020-01-17 15:21:44	IPL-17O-2073	Data_2073 IPL-17O-2073 VSMOW2-B4-R13-10	0	-10.8325	0.00368503	-21.0182	0.00147022	-31.7815	0.141043	1702.91	0.44086	0	2	-0.624524	-1.17315	-0.00510079	-5.10079	-0.624524	-1.17315	-5.10079	no correction	no correction	no correction
13	2074	WaterStd	SMOW	SMOW	2020-01-17 17:15:36	IPL-17O-2074	Data_2074 IPL-17O-2074 SMOW2-B4-R13-11	0	-10.5857	0.00466021	-20.5593	0.00119593	-31.314	0.143631	1367.97	0.254471	0	2	-0.353681	-0.66507	-0.00252386	-2.52386	-0.353681	-0.66507	-2.52386	no correction	no correction	no correction
13	2075	WaterStd	SMOW	SMOW	2020-01-20 08:19:21	IPL-17O-2075	Data_2075 IPL-17O-2075 SMOW2-B4-R13-12	1	-10.8037	0.00433065	-20.9552	0.00251381	-33.1076	0.146108	1851.3	0.49436	0	2	-0.604859	-1.12908	-0.00870308	-8.70308	-0.604859	-1.12908	-8.70308	no correction	no correction	no correction
13	2083	Carbonate	Julia's Samples	Goler4	2020-01-22 15:35:12	IPL-17O-2083	Data_2083 IPL-17O-2083 Goler4-R13-1	0	4.51642	0.00410183	8.21445	0.00555284	7.57397	0.144985	1767.45	0.566183	0	2	16.0813	30.686	-0.120941	-120.941	12.4012	23.6434	-82.5369	secondary correction applied	secondary correction applied	mineral + 1-pt normalization applied to D17O for data.cor[[6]] using IAEA-603 and/or IAEA-C1 as calcite. Offset=-7.26 per meg
13	2084	Carbonate	Julia's Samples	Goler4	2020-01-22 17:31:40	IPL-17O-2084	Data_2084 IPL-17O-2084 Goler4-R13-2	0	4.62653	0.00499873	8.45071	0.00130446	8.12787	0.11275	2350.4	0.388525	0	2	16.1999	30.939	-0.135884	-135.884	12.518	23.893	-97.4808	secondary correction applied	secondary correction applied	mineral + 1-pt normalization applied to D17O for data.cor[[6]] using IAEA-603 and/or IAEA-C1 as calcite. Offset=-7.26 per meg
13	2091	CarbonateStd	IAEA-C1	IAEA-C1	2020-01-24 09:34:59	IPL-17O-2091	Data_2091 IPL-17O-2091 IAEA-C1-R13-18	0	6.39563	0.00501201	11.8524	0.00148836	11.8355	0.137381	1589.9	0.442982	0	2	18.1025	34.5699	-0.150367	-150.367	14.3948	27.475	-111.963	secondary correction applied	secondary correction applied	mineral + 1-pt normalization applied to D17O for data.cor[[6]] using IAEA-603 and/or IAEA-C1 as calcite. Offset=-7.26 per meg
13	2093	CarbonateStd	102-GC-AZ01	102-GC-AZ01	2020-01-24 14:12:51	IPL-17O-2093	Data_2093 IPL-17O-2093 102-GC-AZ-01-R13-28	0	1.71235	0.00584212	2.86681	0.00122336	2.28777	0.122081	1037.75	0.294604	0	2	13.0375	24.9063	-0.113006	-113.006	9.39837	17.9412	-74.6027	secondary correction applied	secondary correction applied	mineral + 1-pt normalization applied to D17O for data.cor[[6]] using IAEA-603 and/or IAEA-C1 as calcite. Offset=-7.26 per meg
13	2097	Carbonate	Julia's Samples	Goler8	2020-01-25 18:39:48	IPL-17O-2097	Data_2097 IPL-17O-2097 Goler8-R13-1	0	3.74547	0.00348002	6.72701	0.000980364	7.96593	0.134774	1840.43	0.304265	0	2	15.2339	29.0571	-0.108274	-108.274	11.5653	22.0363	-69.8701	secondary correction applied	secondary correction applied	mineral + 1-pt normalization applied to D17O for data.cor[[6]] using IAEA-603 and/or IAEA-C1 as calcite. Offset=-7.26 per meg
13	2098	Carbonate	Julia's Samples	Goler8	2020-01-27 09:30:21	IPL-17O-2098	Data_2098 IPL-17O-2098 Goler8-R13-2	0	2.47857	0.00482847	4.35691	0.0012797	2.62598	0.150026	2810.82	0.858618	0	2	13.8554	26.4883	-0.130419	-130.419	10.2051	19.502	-92.0151	secondary correction applied	secondary correction applied	mineral + 1-pt normalization applied to D17O for data.cor[[6]] using IAEA-603 and/or IAEA-C1 as calcite. Offset=-7.26 per meg
13	2114	CarbonateStd	102-GC-AZ01	102-GC-AZ01	2020-01-30 09:18:28	IPL-17O-2114	Data_2113 IPL-17O-2114 102-GC-AZ01-R13-30	0	0.949174	0.00449978	1.39587	0.00143261	-2.20953	0.125451	1471.26	0.384001	0	2	12.1842	23.2606	-0.0973736	-97.3736	8.55676	16.3177	-58.97	secondary correction applied	secondary correction applied	mineral + 1-pt normalization applied to D17O for data.cor[[6]] using IAEA-603 and/or IAEA-C1 as calcite. Offset=-7.26 per meg
13	2116	CarbonateStd	IAEA-C1	IAEA-C1	2020-01-30 14:10:48	IPL-17O-2116	Data_2115 IPL-17O-2116 IAEA-C1-R13-20	0	6.66265	0.00331594	12.3239	0.00131757	13.6026	0.151904	2173.18	0.181046	0	2	18.3631	35.0155	-0.125024	-125.024	14.6523	27.9146	-86.6202	secondary correction applied	secondary correction applied	mineral + 1-pt normalization applied to D17O for data.cor[[6]] using IAEA-603 and/or IAEA-C1 as calcite. Offset=-7.26 per meg
13	2117	Carbonate	Julia's Samples	Goler4	2020-01-30 16:28:00	IPL-17O-2117	Data_2116 IPL-17O-2117 Goler4-R13-3	0	4.75577	0.00322652	8.67988	0.000967881	8.69668	0.144776	2289.77	0.286249	0	2	16.3044	31.1095	-0.121381	-121.381	12.6213	24.0611	-82.9774	secondary correction applied	secondary correction applied	mineral + 1-pt normalization applied to D17O for data.cor[[6]] using IAEA-603 and/or IAEA-C1 as calcite. Offset=-7.26 per meg
13	2118	Carbonate	Julia's Samples	Goler4	2020-01-30 18:38:14	IPL-17O-2118	Data_2117 IPL-17O-2118 Goler4-R13-4	0	4.38392	0.00311921	7.94805	0.00118917	9.76688	0.130264	2746.33	0.24512	0	2	15.9022	30.3226	-0.108137	-108.137	12.2246	23.2848	-69.7333	secondary correction applied	secondary correction applied	mineral + 1-pt normalization applied to D17O for data.cor[[6]] using IAEA-603 and/or IAEA-C1 as calcite. Offset=-7.26 per meg
13	2127	Carbonate	Julia's Samples	Goler8	2020-02-03 21:18:58	IPL-17O-2127	Data_2126 IPL-17O-2127 Goler8-R13-3	0	3.79469	0.00412782	6.8331	0.00124029	6.40888	0.117205	1509.34	0.244368	0	2	15.2469	29.0847	-0.10981	-109.81	11.5781	22.0635	-71.4063	secondary correction applied	secondary correction applied	mineral + 1-pt normalization applied to D17O for data.cor[[6]] using IAEA-603 and/or IAEA-C1 as calcite. Offset=-7.26 per meg
13	2132	CarbonateStd	102-GC-AZ01	102-GC-AZ01	2020-02-04 20:15:35	IPL-17O-2132	Data_2131 IPL-17O-2132 102-GC-AZ01-R13-31	0	0.671778	0.00422174	0.860624	0.00128292	-2.55307	0.127931	1616.49	0.339681	0	2	11.8591	22.6293	-0.0891665	-89.1665	8.23612	15.6949	-50.7628	secondary correction applied	secondary correction applied	mineral + 1-pt normalization applied to D17O for data.cor[[6]] using IAEA-603 and/or IAEA-C1 as calcite. Offset=-7.26 per meg
13	2133	CarbonateStd	102-GC-AZ01	102-GC-AZ01	2020-02-05 11:46:15	IPL-17O-2133	Data_2132 IPL-17O-2133 102-GC-AZ01-R13-32	0	0.724658	0.00522244	0.978163	0.00135568	-3.28451	0.131012	1759.67	0.34173	0	2	11.9136	22.7504	-0.0985833	-98.5833	8.2898	15.8143	-60.1796	secondary correction applied	secondary correction applied	mineral + 1-pt normalization applied to D17O for data.cor[[6]] using IAEA-603 and/or IAEA-C1 as calcite. Offset=-7.26 per meg
13	2135	CarbonateStd	IAEA-C1	IAEA-C1	2020-02-05 17:21:15	IPL-17O-2135	Data_2134 IPL-17O-2135 IAEA-C1-R13-22	0	6.88111	0.00389479	12.7416	0.00100457	14.5036	0.125676	1559.24	0.217288	0	2	18.5716	35.4039	-0.121641	-121.641	14.858	28.2978	-83.2369	secondary correction applied	secondary correction applied	mineral + 1-pt normalization applied to D17O for data.cor[[6]] using IAEA-603 and/or IAEA-C1 as calcite. Offset=-7.26 per meg
13	2136	WaterStd	SMOW	SMOW	2020-02-06 12:24:18	IPL-17O-2136	Data_2135 IPL-17O-2136 VSMOW2-B4-R13-13	2	-9.60263	0.00354791	-18.6814	0.00211401	-31.4704	0.119277	1398.43	0.408796	0	2	0.638287	1.22589	-0.00898582	-8.98582	0.638287	1.22589	-8.98582	no correction	no correction	no correction
13	2137	WaterStd	SMOW	SMOW	2020-02-06 14:20:03	IPL-17O-2137	Data_2136 IPL-17O-2137 VSMOW2-B4-R13-14	0	-9.94221	0.00359681	-19.3374	0.00131479	-32.9139	0.156708	1901.15	0.299486	0	2	0.265158	0.499136	0.00161408	1.61408	0.265158	0.499136	1.61408	no correction	no correction	no correction
13	2138	WaterStd	SMOW	SMOW	2020-02-06 16:12:19	IPL-17O-2138	Data_2137 IPL-17O-2138 SMOW2-B4-R13-15	0	-10.001	0.00407333	-19.4432	0.00133328	-32.4168	0.154023	1602.47	0.27087	0	2	0.200221	0.381314	-0.00111288	-1.11288	0.200221	0.381314	-1.11288	no correction	no correction	no correction
13	2139	WaterStd	SMOW	SMOW	2020-02-06 18:45:38	IPL-17O-2139	Data_2138 IPL-17O-2139 VSMOW2-B4-R13-16	0	-9.90306	0.00347503	-19.2884	0.00145562	-29.4081	0.133876	1524.91	0.338332	0	2	0.307333	0.551585	0.0160957	16.0957	0.307333	0.551585	16.0957	no correction	no correction	no correction
13	2140	WaterStd	SLAP	SLAP	2020-02-07 08:32:02	IPL-17O-2140	Data_2139 IPL-17O-2140 SLAP2-B5-R13-17	2	-37.6	0.00591957	-70.5921	0.00556446	-102.509	0.137806	1554.42	0.41556	0	2	-30.5756	-57.9219	0.00715349	7.15349	-30.5756	-57.9219	7.15349	no correction	no correction	no correction
13	2141	WaterStd	SLAP	SLAP	2020-02-07 10:24:30	IPL-17O-2141	Data_2140 IPL-17O-2141 SLAP2-B5-R13-18	0	-37.3573	0.00488443	-70.1286	0.00196399	-102.594	0.123615	1826.23	0.210587	0	2	-30.3011	-57.3789	-0.00505394	-5.05394	-30.3011	-57.3789	-5.05394	no correction	no correction	no correction
13	2142	WaterStd	SLAP	SLAP	2020-02-07 12:20:06	IPL-17O-2142	Data_2141 IPL-17O-2142 SLAP2-B5-R13-19	0	-37.3958	0.00441696	-70.2028	0.00170462	-102.652	0.159731	1972.75	0.277999	0	2	-30.3451	-57.4667	-0.002653	-2.653	-30.3451	-57.4667	-2.653	no correction	no correction	no correction
13	2143	WaterStd	SLAP	SLAP	2020-02-07 14:59:19	IPL-17O-2143	Data_2142 IPL-17O-2143 SLAP2-B5-R13-20	0	-37.4943	0.00410879	-70.394	0.00141021	-102.707	0.116267	1761.78	0.165125	0	2	-30.4571	-57.6921	0.00430292	4.30292	-30.4571	-57.6921	4.30292	no correction	no correction	no correction
14	2144	WaterStd	House DI	House DI	2020-02-17 12:17:06	IPL-17O-2144	Data_1 IPL-17O-2144 House DI #1-R14-1	1	-13.6704	0.00336341	-26.3898	0.00326867	-42.6923	0.119151	1628.81	0.862808	0	1	-3.32338	-6.34399	0.0262504	26.2504	-3.32338	-6.34399	26.2504	no correction	no correction	no correction
14	2145	WaterStd	House DI	House DI	2020-02-17 14:35:10	IPL-17O-2145	Data_2 IPL-17O-2145 House DI #1-R14-2	0	-13.7288	0.0052388	-26.4785	0.00118626	-42.3533	0.151049	1068.99	0.349991	0	1	-3.38715	-6.44243	0.0144557	14.4557	-3.38715	-6.44243	14.4557	no correction	no correction	no correction
14	2146	WaterStd	House DI	House DI	2020-02-17 16:37:37	IPL-17O-2146	Data_3 IPL-17O-2146 House DI #1-R14-3	0	-13.7081	0.00375733	-26.451	0.00109022	-42.3081	0.130642	1176.68	0.147448	0	1	-3.36661	-6.41581	0.0209393	20.9393	-3.36661	-6.41581	20.9393	no correction	no correction	no correction
14	2147	WaterStd	House DI	House DI	2020-02-18 08:09:52	IPL-17O-2147	Data_4 IPL-17O-2147 House DI #1-R14-4	0	-13.8038	0.00468662	-26.6153	0.00208708	-43.0095	0.156794	1000.61	0.21914	0	1	-3.47981	-6.61431	0.0125434	12.5434	-3.47981	-6.61431	12.5434	no correction	no correction	no correction
14	2148	WaterStd	House DI	House DI	2020-02-18 10:18:58	IPL-17O-2148	Data_5 IPL-17O-2148 House DI #1-R14-5	0	-13.7489	0.00456071	-26.5163	0.0012522	-42.7154	0.145286	1162.39	0.166997	0	1	-3.42324	-6.51107	0.0146045	14.6045	-3.42324	-6.51107	14.6045	no correction	no correction	no correction
14	2149	WaterStd	House DI	House DI	2020-02-18 12:07:14	IPL-17O-2149	Data_6 IPL-17O-2149 House DI #1-R14-6	0	-13.7966	0.00331782	-26.5986	0.00115383	-43.0332	0.14982	968.002	0.180784	0	1	-3.47519	-6.602	0.0106693	10.6693	-3.47519	-6.602	10.6693	no correction	no correction	no correction
14	2150	WaterStd	House DI	House DI	2020-02-18 14:46:24	IPL-17O-2150	Data_7 IPL-17O-2150 House DI #1-R14-7	0	-13.7517	0.00293002	-26.537	0.00139133	-42.7814	0.160516	1139.02	0.168532	0	1	-3.42951	-6.53962	0.0234098	23.4098	-3.42951	-6.53962	23.4098	no correction	no correction	no correction
14	2151	WaterStd	SLAP	SLAP	2020-02-18 17:13:32	IPL-17O-2151	Data_8 IPL-17O-2151 SLAP2-B5-R14-1	2	-38.5823	0.00399904	-72.3981	0.00145828	-108.46	0.132228	985.941	0.0925493	0	1	-30.131	-57.0545	-0.00619196	-6.19196	-30.131	-57.0545	-6.19196	no correction	no correction	no correction
14	2152	WaterStd	SLAP	SLAP	2020-02-19 08:11:14	IPL-17O-2152	Data_9 IPL-17O-2152 SLAP2-B5-R14-2	1	-38.5438	0.0071989	-72.3255	0.00537504	-108.224	0.128031	1225.4	0.216783	0	1	-30.1004	-56.9938	-0.0076382	-7.6382	-30.1004	-56.9938	-7.6382	no correction	no correction	no correction
14	2153	WaterStd	SLAP	SLAP	2020-02-19 10:01:42	IPL-17O-2153	Data_10 IPL-17O-2153 SLAP2-B5-R14-3	0	-38.6424	0.00716679	-72.4533	0.00128514	-108.499	0.156502	1020.34	0.151296	0	1	-30.2091	-57.1408	-0.0387568	-38.7568	-30.2091	-57.1408	-38.7568	no correction	no correction	no correction
14	2154	WaterStd	SLAP	SLAP	2020-02-19 13:13:45	IPL-17O-2154	Data_11 IPL-17O-2154 SLAP2-B5-R14-4	0	-38.6254	0.0039576	-72.4582	0.00123824	-108.633	0.150746	959.683	0.157282	0	1	-30.193	-57.1508	-0.0173554	-17.3554	-30.193	-57.1508	-17.3554	no correction	no correction	no correction
14	2155	WaterStd	SMOW	SMOW	2020-02-19 15:17:04	IPL-17O-2155	Data_12 IPL-17O-2155 VSMOW2-B4-R14-1	2	-10.6635	0.00368086	-20.6994	0.00131078	-34.8899	0.151853	1167.41	0.25575	0	1	-0.176547	-0.324074	-0.0054366	-5.4366	-0.176547	-0.324074	-5.4366	no correction	no correction	no correction
14	2156	WaterStd	SMOW	SMOW	2020-02-19 17:15:33	IPL-17O-2156	Data_13 IPL-17O-2156 VSMOW2-B4-R14-2	0	-10.4437	0.00315199	-20.3037	0.00101014	-34.4993	0.135422	1358.58	0.13919	0	1	0.0544758	0.095431	0.00408821	4.08821	0.0544758	0.095431	4.08821	no correction	no correction	no correction
14	2157	WaterStd	SMOW	SMOW	2020-02-20 08:24:32	IPL-17O-2157	Data_14 IPL-17O-2157 VSMOW2-B4-R14-3	1	-10.4193	0.0052785	-20.2324	0.00215406	-34.8562	0.158624	1219.47	0.324538	0	1	0.0688657	0.150013	-0.0103414	-10.3414	0.0688657	0.150013	-10.3414	no correction	no correction	no correction
14	2158	WaterStd	SMOW	SMOW	2020-02-20 10:50:13	IPL-17O-2158	Data_15 IPL-17O-2158 VSMOW2-B4-R14-4	0	-10.3548	0.00296974	-20.1257	0.00153477	-34.8858	0.138161	1393.47	0.163003	0	1	0.135286	0.260369	-0.00218826	-2.18825	0.135286	0.260369	-2.18825	no correction	no correction	no correction
14	2159	WaterStd	USGS45	USGS45	2020-02-20 12:39:03	IPL-17O-2159	Data_16 IPL-17O-2159 USGS45-B1-R14-1	1	-11.4418	0.00435012	-22.1836	0.00117804	-37.5446	0.163804	1240.24	0.164149	0	1	-1.01601	-1.93976	0.00818499	8.18499	-1.01601	-1.93976	8.18499	no correction	no correction	no correction
14	2160	WaterStd	USGS45	USGS45	2020-02-20 14:35:15	IPL-17O-2160	Data_17 IPL-17O-2160 USGS45-B1-R14-2	0	-11.4751	0.00393644	-22.2188	0.000990134	-37.8311	0.111648	1039.81	0.119683	0	1	-1.05267	-1.98014	-0.00715852	-7.15852	-1.05267	-1.98014	-7.15852	no correction	no correction	no correction
14	2161	WaterStd	USGS50	USGS50	2020-02-20 16:33:23	IPL-17O-2161	Data_18 IPL-17O-2161 USGS50-B1-R14-1	2	-7.78718	0.00483541	-15.2819	0.00110304	-27.4473	0.163497	1053.07	0.266603	0	1	2.8419	5.40584	-0.012382	-12.382	2.8419	5.40584	-12.382	no correction	no correction	no correction
14	2162	WaterStd	USGS50	USGS50	2020-02-21 08:10:03	IPL-17O-2162	Data_19 IPL-17O-2162 USGS50-B1-R14-2	1	-7.74984	0.00448536	-15.2156	0.00182581	-28.2157	0.148267	1294.25	0.298385	0	1	2.86958	5.45415	-0.0102153	-10.2153	2.86958	5.45415	-10.2153	no correction	no correction	no correction
14	2171	WaterStd	USGS47	USGS47	2020-02-24 17:52:40	IPL-17O-2171	Data_28 IPL-17O-2171 USGS47-B2-R14-1	2	-20.0838	0.00371259	-38.3552	0.00132368	-57.8282	0.132032	877.253	0.183396	0	1	-10.281	-19.5228	0.0270218	27.0218	-10.281	-19.5228	27.0218	no correction	no correction	no correction
14	2172	WaterStd	USGS47	USGS47	2020-02-25 09:03:17	IPL-17O-2172	Data_29 IPL-17O-2172 USGS47-B2-R14-2	1	-20.2669	0.00428339	-38.6705	0.00300731	-58.4165	0.11743	1144.48	0.235899	0	1	-10.4881	-19.8874	0.0124962	12.4962	-10.4881	-19.8874	12.4962	no correction	no correction	no correction
14	2175	WaterStd	USGS50	USGS50	2020-02-25 14:43:08	IPL-17O-2175	Data_32 IPL-17O-2175 USGS50-B1-R14-3	2	-7.85518	0.00388102	-15.4172	0.00116106	-25.3076	0.167822	1064.5	0.216205	0	1	2.68171	5.09481	-0.00835574	-8.35574	2.68171	5.09481	-8.35574	no correction	no correction	no correction
14	2176	WaterStd	USGS50	USGS50	2020-02-25 16:30:48	IPL-17O-2176	Data_33 IPL-17O-2176 USGS50-B1-R14-4	0	-7.87507	0.00379709	-15.4357	0.00111123	-25.1195	0.148115	1077.25	0.0910072	0	1	2.6594	5.07267	-0.0189746	-18.9746	2.6594	5.07267	-18.9746	no correction	no correction	no correction
14	2183	WaterStd	USGS45	USGS45	2020-02-27 08:13:08	IPL-17O-2183	Data_40 IPL-17O-2183 USGS45-B1-R14-3	1	-11.4075	0.00394162	-22.1474	0.00203678	-36.1238	0.164278	1317.99	0.314153	0	1	-1.10218	-2.13294	0.024014	24.014	-1.10218	-2.13294	24.014	no correction	no correction	no correction
14	2184	WaterStd	USGS45	USGS45	2020-02-27 10:20:25	IPL-17O-2184	Data_41 IPL-17O-2184 USGS45-B1-R14-4	0	-11.4277	0.00385242	-22.1629	0.00112561	-35.8235	0.142885	1265.88	0.258665	0	1	-1.12511	-2.1525	0.0114067	11.4067	-1.12511	-2.1525	11.4067	no correction	no correction	no correction
14	2187	WaterStd	USGS47	USGS47	2020-02-27 17:02:35	IPL-17O-2187	Data_44 IPL-17O-2187 USGS47-B2-R14-3	1	-20.077	0.00393862	-38.3513	0.00109927	-57.276	0.128616	1393.13	0.141695	0	1	-10.3271	-19.6195	0.0319698	31.9698	-10.3271	-19.6195	31.9698	no correction	no correction	no correction
14	2188	WaterStd	USGS47	USGS47	2020-02-27 18:54:42	IPL-17O-2188	Data_45 IPL-17O-2188 USGS47-B2-R14-4	0	-20.0734	0.00348148	-38.3343	0.00119183	-57.5876	0.113134	1262.64	0.250349	0	1	-10.3246	-19.6037	0.026128	26.1281	-10.3246	-19.6037	26.1281	no correction	no correction	no correction
14	2191	WaterStd	SMOW	SMOW	2020-02-28 12:16:40	IPL-17O-2191	Data_48 IPL-17O-2191 VSMOW2-B4-R14-5	2	-10.3934	0.00421613	-20.2278	0.00135895	-31.895	0.145972	1367.07	0.176031	0	1	-0.0504176	-0.12269	0.0143625	14.3625	-0.0504176	-0.12269	14.3625	no correction	no correction	no correction
14	2192	WaterStd	SMOW	SMOW	2020-02-28 14:08:42	IPL-17O-2192	Data_49 IPL-17O-2192 VSMOW2-B4-R14-6	0	-10.3549	0.00393522	-20.1298	0.00122485	-31.4009	0.144656	1426.52	0.139744	0	1	-0.0110826	-0.0207979	-0.000101327	-0.101327	-0.0110826	-0.0207979	-0.101327	no correction	no correction	no correction
14	2193	WaterStd	SMOW	SMOW	2020-02-28 16:03:49	IPL-17O-2193	Data_50 IPL-17O-2193 VSMOW2-B4-R14-7	0	-10.3032	0.00412977	-20.0432	0.00114747	-31.1666	0.134793	1681.56	0.247404	0	1	0.04217	0.0688688	0.00580726	5.80726	0.04217	0.0688688	5.80726	no correction	no correction	no correction
14	2194	WaterStd	SMOW	SMOW	2020-03-02 07:17:47	IPL-17O-2194	Data_51 IPL-17O-2194 VSMOW2-B4-R14-8	1	-10.4036	0.00408729	-20.222	0.00277051	-32.7784	0.158249	971.832	0.4103	0	1	-0.111422	-0.211571	0.000287901	0.287901	-0.111422	-0.211571	0.287901	no correction	no correction	no correction
14	2195	WaterStd	SLAP	SLAP	2020-03-02 09:18:58	IPL-17O-2195	Data_52 IPL-17O-2195 SLAP2-B5-R14-5	2	-38.0708	0.0146629	-71.4668	0.00170607	-105.236	0.139742	801.247	0.135223	0	1	-29.8019	-56.4351	-0.00413527	-4.13527	-29.8019	-56.4351	-4.13527	no correction	no correction	no correction
14	2196	WaterStd	SLAP	SLAP	2020-03-02 11:11:44	IPL-17O-2196	Data_53 IPL-17O-2196 SLAP2-B5-R14-6	0	-38.3827	0.00296831	-72.0308	0.00112446	-106.161	0.156546	775.433	0.115668	0	1	-30.143	-57.0744	-0.00772698	-7.72698	-30.143	-57.0744	-7.72698	no correction	no correction	no correction
14	2197	WaterStd	SLAP	SLAP	2020-03-02 13:02:06	IPL-17O-2197	Data_54 IPL-17O-2197 SLAP2-B5-R14-7	0	-38.5996	0.00441965	-72.4203	0.00103879	-107.554	0.14517	784.026	0.104455	0	1	-30.3807	-57.517	-0.0117609	-11.7609	-30.3807	-57.517	-11.7609	no correction	no correction	no correction
14	2198	WaterStd	SLAP	SLAP	2020-03-02 14:51:01	IPL-17O-2198	Data_55 IPL-17O-2198 SLAP2-B5-R14-8	0	-38.5848	0.00564362	-72.3987	0.000989618	-107.538	0.128067	872.672	0.0827758	0	1	-30.366	-57.4951	-0.00858368	-8.58368	-30.366	-57.4951	-8.58368	no correction	no correction	no correction
14	2199	WaterStd	Furnace	Furnace	2020-03-02 16:50:22	IPL-17O-2199	Data_56 IPL-17O-2199 Furnace Water #1-R14-1	2	0.905304	0.00498875	1.83693	0.00111555	-0.838648	0.135538	1165.41	0.112349	0	1	11.7675	23.0355	-0.395261	-395.26	11.7675	23.0355	-395.26	no correction	no correction	no correction
14	2200	WaterStd	Furnace	Furnace	2020-03-03 08:19:24	IPL-17O-2200	Data_57 IPL-17O-2200 Furnace Water #1-R14-2	1	1.22025	0.00392882	2.44203	0.0011659	-0.311975	0.158017	1166.76	0.310873	0	1	12.0849	23.6441	-0.399176	-399.176	12.0849	23.6441	-399.176	no correction	no correction	no correction
14	2201	CarbonateStd	102-GC-AZ01	102-GC-AZ01	2020-03-03 13:58:11	IPL-17O-2201	Data_58 IPL-17O-2201 102-GC-AZ01-R14-1	0	1.04076	0.00407396	1.62104	0.00098689	-0.929626	0.173893	702.059	0.130427	0	1	11.8932	22.7805	-0.134943	-134.943	8.02947	15.373	-87.491	secondary correction applied	secondary correction applied	mineral + 1-pt normalization applied to D17O for data.cor[[2]] using IAEA-603 and/or IAEA-C1 as calcite. Offset=1.79 per meg
14	2202	CarbonateStd	102-GC-AZ01	102-GC-AZ01	2020-03-03 16:20:44	IPL-17O-2202	Data_59 IPL-17O-2202 102-GC-AZ01-R14-2	0	1.13412	0.00363785	1.77303	0.00144423	-0.535643	0.124257	940.379	0.125114	0	1	11.9889	22.9356	-0.121077	-121.077	8.13587	15.5483	-73.6253	secondary correction applied	secondary correction applied	mineral + 1-pt normalization applied to D17O for data.cor[[2]] using IAEA-603 and/or IAEA-C1 as calcite. Offset=1.79 per meg
14	2204	CarbonateStd	IAEA-C1	IAEA-C1	2020-03-04 08:53:00	IPL-17O-2204	Data_61 IPL-17O-2204 IAEA-C1-R14-2	0	6.42438	0.00503161	11.9093	0.00147379	13.3394	0.143705	869.748	0.187047	0	1	17.4873	33.4226	-0.159794	-159.794	14.3543	27.3989	-112.342	secondary correction applied	secondary correction applied	mineral + 1-pt normalization applied to D17O for data.cor[[2]] using IAEA-603 and/or IAEA-C1 as calcite. Offset=1.79 per meg
14	2205	CarbonateStd	IAEA-C1	IAEA-C1	2020-03-04 11:23:31	IPL-17O-2205	Data_62 IPL-17O-2205 IAEA-C1-R14-3	0	6.99607	0.00411463	13.0009	0.0016774	15.0946	0.120103	812.121	0.0817238	0	1	18.0791	34.5443	-0.160253	-160.253	15.0231	28.6666	-112.801	secondary correction applied	secondary correction applied	mineral + 1-pt normalization applied to D17O for data.cor[[2]] using IAEA-603 and/or IAEA-C1 as calcite. Offset=1.79 per meg
14	2206	CarbonateStd	IAEA-603	IAEA-603	2020-03-04 15:55:17	IPL-17O-2206	Data_63 IPL-17O-2206 IAEA-603-R14-1	0	6.97361	0.00308616	12.9281	0.00115918	14.6921	0.147868	945.787	0.094592	0	1	18.0524	34.4629	-0.143964	-143.964	14.9909	28.5745	-96.5117	secondary correction applied	secondary correction applied	mineral + 1-pt normalization applied to D17O for data.cor[[2]] using IAEA-603 and/or IAEA-C1 as calcite. Offset=1.79 per meg
14	2220	Carbonate	Julia's Samples	Goler3	2020-03-07 15:37:16	IPL-17O-2220	Data_77 IPL-17O-2220 Goler3-R14-1	0	4.36095	0.00358185	7.92407	0.00144597	9.3039	0.136594	974.566	0.106562	0	1	15.2826	29.192	-0.130795	-130.795	11.8591	22.6182	-83.3431	secondary correction applied	secondary correction applied	mineral + 1-pt normalization applied to D17O for data.cor[[2]] using IAEA-603 and/or IAEA-C1 as calcite. Offset=1.79 per meg
14	2221	Carbonate	Julia's Samples	Goler3	2020-03-09 09:18:17	IPL-17O-2221	Data_78 IPL-17O-2221 Goler3-R14-2	0	3.0678	0.00486004	5.48035	0.00193946	4.05477	0.165317	1604.38	0.39466	0	1	13.9042	26.5987	-0.139895	-139.895	10.3027	19.6877	-92.4434	secondary correction applied	secondary correction applied	mineral + 1-pt normalization applied to D17O for data.cor[[2]] using IAEA-603 and/or IAEA-C1 as calcite. Offset=1.79 per meg
14	2224	CarbonateStd	102-GC-AZ01	102-GC-AZ01	2020-03-09 16:19:23	IPL-17O-2224	Data_81 IPL-17O-2224 102-GC-AZ01-R14-3	0	1.50464	0.0052911	2.45313	0.00121953	0.302299	0.137231	973.714	0.133617	0	1	12.2681	23.4405	-0.108443	-108.443	8.44973	16.1188	-60.9908	secondary correction applied	secondary correction applied	mineral + 1-pt normalization applied to D17O for data.cor[[2]] using IAEA-603 and/or IAEA-C1 as calcite. Offset=1.79 per meg
14	2225	CarbonateStd	102-GC-AZ01	102-GC-AZ01	2020-03-09 18:27:53	IPL-17O-2225	Data_82 IPL-17O-2225 102-GC-AZ01-R14-4	0	1.5578	0.00587986	2.5538	0.0012012	0.137103	0.122241	872.963	0.144236	0	1	12.322	23.5423	-0.108306	-108.306	8.51062	16.2339	-60.8543	secondary correction applied	secondary correction applied	mineral + 1-pt normalization applied to D17O for data.cor[[2]] using IAEA-603 and/or IAEA-C1 as calcite. Offset=1.79 per meg
14	2227	CarbonateStd	IAEA-C1	IAEA-C1	2020-03-10 09:02:52	IPL-17O-2227	Data_84 IPL-17O-2227 IAEA-C1-R14-5	0	6.16334	0.00632415	11.3921	0.00172686	12.899	0.1642	483.817	0.119884	0	1	17.1082	32.685	-0.149435	-149.435	13.9246	26.5654	-101.983	secondary correction applied	secondary correction applied	mineral + 1-pt normalization applied to D17O for data.cor[[2]] using IAEA-603 and/or IAEA-C1 as calcite. Offset=1.79 per meg
14	2228	CarbonateStd	IAEA-603	IAEA-603	2020-03-10 11:27:53	IPL-17O-2228	Data_85 IPL-17O-2228 IAEA-603-R14-2	0	6.84584	0.00607146	12.6645	0.00129188	15.2812	0.127725	592.721	0.082925	0	1	17.8154	33.9938	-0.133382	-133.382	14.7216	28.0445	-85.9298	secondary correction applied	secondary correction applied	mineral + 1-pt normalization applied to D17O for data.cor[[2]] using IAEA-603 and/or IAEA-C1 as calcite. Offset=1.79 per meg
14	2229	CarbonateStd	IAEA-C1	IAEA-C1	2020-03-10 14:04:11	IPL-17O-2229	Data_86 IPL-17O-2229 IAEA-C1-R14-6	0	7.009	0.0037636	12.9996	0.00145261	15.5118	0.124699	624.338	0.139139	0	1	17.9828	34.3355	-0.146311	-146.311	14.9125	28.4306	-98.8592	secondary correction applied	secondary correction applied	mineral + 1-pt normalization applied to D17O for data.cor[[2]] using IAEA-603 and/or IAEA-C1 as calcite. Offset=1.79 per meg
14	2249	CarbonateStd	IAEA-C1	IAEA-C1	2020-03-16 12:40:03	IPL-17O-2249	Data_106 IPL-17O-2249 IAEA-C1-R14-8	0	6.88529	0.00347314	12.7692	0.00144549	15.4448	0.137456	765.166	0.20464	0	1	17.7477	33.8963	-0.149553	-149.553	14.6472	27.9343	-102.101	secondary correction applied	secondary correction applied	mineral + 1-pt normalization applied to D17O for data.cor[[2]] using IAEA-603 and/or IAEA-C1 as calcite. Offset=1.79 per meg
14	2250	CarbonateStd	IAEA-C1	IAEA-C1	2020-03-16 14:38:10	IPL-17O-2250	Data_107 IPL-17O-2250 IAEA-C1-R14-9	0	7.3142	0.00376161	13.5669	0.00124783	16.255	0.135573	995.915	0.311363	0	1	18.1915	34.7153	-0.138213	-138.213	15.1472	28.8598	-90.7611	secondary correction applied	secondary correction applied	mineral + 1-pt normalization applied to D17O for data.cor[[2]] using IAEA-603 and/or IAEA-C1 as calcite. Offset=1.79 per meg
14	2251	CarbonateStd	IAEA-603	IAEA-603	2020-03-16 17:35:23	IPL-17O-2251	Data_108 IPL-17O-2251 IAEA-603-R14-3	0	7.25033	0.00403326	13.4596	0.00134018	16.1272	0.151191	1026	0.161132	0	1	18.123	34.6006	-0.146163	-146.163	15.0708	28.7302	-98.7111	secondary correction applied	secondary correction applied	mineral + 1-pt normalization applied to D17O for data.cor[[2]] using IAEA-603 and/or IAEA-C1 as calcite. Offset=1.79 per meg
14	2253	CarbonateStd	102-GC-AZ01	102-GC-AZ01	2020-03-16 21:45:12	IPL-17O-2253	Data_110 IPL-17O-2253 102-GC-AZ01-R14-6	0	1.87038	0.00399841	3.16386	0.00141249	0.988184	0.161213	891.133	0.264725	0	1	12.5202	23.9351	-0.117561	-117.561	8.73573	16.6777	-70.1094	secondary correction applied	secondary correction applied	mineral + 1-pt normalization applied to D17O for data.cor[[2]] using IAEA-603 and/or IAEA-C1 as calcite. Offset=1.79 per meg
14	2255	WaterStd	SMOW	SMOW	2020-03-17 10:18:43	IPL-17O-2255	Data_112 IPL-17O-2255 VSMOW2-B4-R14-10	0	-9.97566	0.00351233	-19.4164	0.00132346	-30.4939	0.14814	1298.85	0.125235	0	1	0.0691715	0.133237	-0.0011777	-1.1777	0.0691715	0.133237	-1.1777	no correction	no correction	no correction
14	2256	WaterStd	SMOW	SMOW	2020-03-17 12:08:55	IPL-17O-2256	Data_113 IPL-17O-2256 VSMOW2-B4-R14-11	0	-10.0592	0.00352564	-19.5661	0.00135372	-30.3804	0.157309	1148.71	0.282236	0	1	-0.0205396	-0.0289308	-0.00526416	-5.26416	-0.0205396	-0.0289308	-5.26416	no correction	no correction	no correction
14	2258	WaterStd	SLAP	SLAP	2020-03-17 16:36:27	IPL-17O-2258	Data_116 IPL-17O-2258 SLAP2-B5-R14-10	0	-37.8835	0.00327461	-71.1129	0.00120295	-105.26	0.148053	1049.6	0.130613	0	1	-29.8733	-56.5575	-0.0109159	-10.9159	-29.8733	-56.5575	-10.9159	no correction	no correction	no correction
14	2259	WaterStd	SLAP	SLAP	2020-03-18 07:45:43	IPL-17O-2259	Data_117 IPL-17O-2259 SLAP2-B5-R14-11	0	-38.3546	0.00506062	-71.9977	0.0060182	-105.403	0.137683	1038.66	0.2489	0	1	-30.3977	-57.5776	0.00322855	3.22855	-30.3977	-57.5776	3.22855	no correction	no correction	no correction
15	2261	WaterStd	House DI	House DI	2020-05-27 13:19:41	IPL-17O-2261	Data_122 IPL-17O-2261 House DI#1-R15-2	0	-13.6246	0.00330847	-26.4375	0.00102665	-15.078	0.121044	NA	NA	0	1	-3.58185	-6.81322	0.0155311	15.5311	-3.58185	-6.81322	15.5311	no correction	no correction	no correction
15	2262	WaterStd	House DI	House DI	2020-05-27 15:07:27	IPL-17O-2262	Data_123 IPL-17O-2262 House DI#1-R15-3	0	-13.6972	0.00454737	-26.5601	0.00136614	-17.0459	0.118387	2605.3	3.47356	0	1	-3.66228	-6.95059	0.00763097	7.63097	-3.66228	-6.95059	7.63097	no correction	no correction	no correction
15	2263	WaterStd	House DI	House DI	2020-05-27 16:59:15	IPL-17O-2263	Data_124 IPL-17O-2263 House DI#1-R15-4	0	-13.6476	0.00376146	-26.4877	0.00122732	-18.2744	0.097207	3070.95	3.2701	0	1	-3.60732	-6.86943	0.0197348	19.7348	-3.60732	-6.86943	19.7348	no correction	no correction	no correction
15	2264	WaterStd	House DI	House DI	2020-05-27 18:48:02	IPL-17O-2264	Data_125 IPL-17O-2264 House DI #1-R15-5	2	-13.7263	0.00424021	-26.6336	0.00125033	-19.8136	0.0903459	2649.77	1.8539	0	1	-3.69457	-7.03299	0.0188479	18.848	-3.69457	-7.03299	18.848	no correction	no correction	no correction
15	2266	WaterStd	SMOW	SMOW	2020-05-28 13:25:56	IPL-17O-2266	Data_127 IPL-17O-2266 VSMOW2-B4-R15-2	0	-10.4229	0.0029216	-20.3978	0.00109311	-17.4122	0.105947	3399.95	2.3846	0	1	-0.041385	-0.0682435	-0.00535243	-5.35243	-0.041385	-0.0682435	-5.35243	no correction	no correction	no correction
15	2267	WaterStd	SMOW	SMOW	2020-05-28 15:14:37	IPL-17O-2267	Data_128 IPL-17O-2267 VSMOW2-B4-R15-3	0	-10.351	0.00313028	-20.2863	0.00122956	-18.0966	0.107332	3758.63	1.68165	0	1	0.0379543	0.055805	0.00848927	8.48927	0.0379543	0.055805	8.48927	no correction	no correction	no correction
15	2268	WaterStd	SMOW	SMOW	2020-05-28 17:04:29	IPL-17O-2268	Data_129 IPL-17O-2268 VSMOW2-B4-R15-4	0	-10.3823	0.00368144	-20.3253	0.00124001	-18.824	0.098644	3236.62	1.23132	0	1	0.00342915	0.0124346	-0.00313632	-3.13632	0.00342915	0.0124346	-3.13632	no correction	no correction	no correction
15	2269	WaterStd	SLAP	SLAP	2020-05-28 18:55:42	IPL-17O-2269	Data_130 IPL-17O-2269 SLAP2-B5-R15-1	2	-36.9991	0.00382314	-69.6732	0.00132953	-62.3813	0.147921	3288.96	1.16019	0	1	-29.817	-56.4735	0.00102192	1.02192	-29.817	-56.4735	1.02192	no correction	no correction	no correction
15	2270	WaterStd	SLAP	SLAP	2020-05-29 10:57:15	IPL-17O-2270	Data_131 IPL-17O-2270 SLAP2-B5-R15-2	1	-37.5537	0.00414037	-70.6628	0.00589142	-62.3374	0.281586	2667.69	3.45494	0	1	-30.4479	-57.6395	-0.0142668	-14.2668	-30.4479	-57.6395	-14.2668	no correction	no correction	no correction
15	2271	WaterStd	SLAP	SLAP	2020-05-29 12:51:04	IPL-17O-2271	Data_132 IPL-17O-2271 SLAP2-B5-R15-3	0	-37.3492	0.00448551	-70.2803	0.00160727	-66.2938	0.185755	2905.94	1.32241	0	1	-30.2153	-57.1886	-0.0196446	-19.6446	-30.2153	-57.1886	-19.6446	no correction	no correction	no correction
15	2272	WaterStd	SLAP	SLAP	2020-05-29 14:40:41	IPL-17O-2272	Data_133 IPL-17O-2272 SLAP2-B5-R15-4	0	-37.2991	0.00382208	-70.2026	0.00138823	-68.3368	0.158473	3114.25	1.02456	0	1	-30.1583	-57.0971	-0.0110298	-11.0298	-30.1583	-57.0971	-11.0298	no correction	no correction	no correction
15	2275	CarbonateStd	ETH-2	ETH-2	2020-06-01 14:23:55	IPL-17O-2275	Data_137 IPL-17O-2275 ETH-2-R15-1	0	-1.42101	0.00382702	-3.20706	0.000967628	-4.52055	0.0974219	2285.55	0.573128	0	1	9.84652	18.8844	-0.124453	-124.453	6.4199	12.2193	-31.8972	secondary correction applied	secondary correction applied	mineral + 1-pt normalization applied to D17O for data.cor[[3]] using IAEA-603 and/or IAEA-C1 as calcite. Offset=46.89 per meg
15	2276	CarbonateStd	ETH-2	ETH-2	2020-06-01 16:35:58	IPL-17O-2276	Data_138 IPL-17O-2276 ETH-2-R15-2	0	-1.36381	0.00385115	-3.10268	0.00107119	-4.52854	0.118137	2127.3	0.677696	0	1	9.90905	18.9984	-0.122119	-122.119	6.49343	12.3542	-29.5631	secondary correction applied	secondary correction applied	mineral + 1-pt normalization applied to D17O for data.cor[[3]] using IAEA-603 and/or IAEA-C1 as calcite. Offset=46.89 per meg
15	2277	CarbonateStd	ETH-2	ETH-2	2020-06-01 18:51:31	IPL-17O-2277	Data_139 IPL-17O-2277 ETH-2-R15-3	0	-1.38026	0.00650504	-3.16199	0.0012856	-5.15306	0.11189	2351.47	0.916446	0	1	9.89106	18.9337	-0.105906	-105.906	6.46919	12.2775	-13.3504	secondary correction applied	secondary correction applied	mineral + 1-pt normalization applied to D17O for data.cor[[3]] using IAEA-603 and/or IAEA-C1 as calcite. Offset=46.89 per meg
15	2278	CarbonateStd	102-GC-AZ01	102-GC-AZ01	2020-06-02 11:37:51	IPL-17O-2278	Data_140 IPL-17O-2278 102-GC-AZ01-R15-3	0	-0.346513	0.00472492	-1.12218	0.00145968	-3.10448	0.105066	2405.73	1.57838	0	1	11.0203	21.1588	-0.151556	-151.556	7.81347	14.91	-59.0002	secondary correction applied	secondary correction applied	mineral + 1-pt normalization applied to D17O for data.cor[[3]] using IAEA-603 and/or IAEA-C1 as calcite. Offset=46.89 per meg
15	2279	CarbonateStd	O2 Injection	O2 Injection	2020-06-02 14:03:21	IPL-17O-2279	Data_141 IPL-17O-2279 O2 Injection-R15-1	0	-0.173845	0.00347734	-0.400415	0.00133123	-2.15681	0.140823	2359.01	0.722101	0	1	11.2088	21.9449	-0.378152	-378.152	8.07794	15.84	-285.596	secondary correction applied	secondary correction applied	mineral + 1-pt normalization applied to D17O for data.cor[[3]] using IAEA-603 and/or IAEA-C1 as calcite. Offset=46.89 per meg
15	2280	CarbonateStd	O2 Injection	O2 Injection	2020-06-02 15:52:26	IPL-17O-2280	Data_142 IPL-17O-2280 O2 Injection-R15-2	0	-0.157919	0.0034981	-0.347484	0.00112504	-2.16492	0.153998	1941.91	0.514479	0	1	11.2262	22.0025	-0.391196	-391.196	8.10089	15.9082	-298.641	secondary correction applied	secondary correction applied	mineral + 1-pt normalization applied to D17O for data.cor[[3]] using IAEA-603 and/or IAEA-C1 as calcite. Offset=46.89 per meg
15	2281	CarbonateStd	O2 Injection	O2 Injection	2020-06-02 17:41:48	IPL-17O-2281	Data_143 IPL-17O-2281 O2 Injection-R15-3	0	-0.196107	0.00520316	-0.428081	0.00130686	-2.62414	0.107258	2168.74	0.481584	0	1	11.1845	21.9148	-0.386547	-386.547	8.05073	15.8044	-293.991	secondary correction applied	secondary correction applied	mineral + 1-pt normalization applied to D17O for data.cor[[3]] using IAEA-603 and/or IAEA-C1 as calcite. Offset=46.89 per meg
15	2282	CarbonateStd	O2 Injection	O2 Injection	2020-06-02 19:34:02	IPL-17O-2282	Data_144 IPL-17O-2282 O2 Injection-R15-4	0	-0.152139	0.00408187	-0.344402	0.00127793	-2.45322	0.131435	1901.64	0.397536	0	1	11.2325	22.0059	-0.386659	-386.659	8.10753	15.9122	-294.103	secondary correction applied	secondary correction applied	mineral + 1-pt normalization applied to D17O for data.cor[[3]] using IAEA-603 and/or IAEA-C1 as calcite. Offset=46.89 per meg
15	2283	CarbonateStd	102-GC-AZ01	102-GC-AZ01	2020-06-03 11:42:30	IPL-17O-2283	Data_145 IPL-17O-2283 102-GC-AZ01-R15-4	0	-0.764977	0.00475521	-1.91731	0.00123131	-2.45092	0.134342	2356.66	0.773345	0	1	10.5633	20.292	-0.15085	-150.85	7.27274	13.8845	-58.2937	secondary correction applied	secondary correction applied	mineral + 1-pt normalization applied to D17O for data.cor[[3]] using IAEA-603 and/or IAEA-C1 as calcite. Offset=46.89 per meg
15	2284	CarbonateStd	102-GC-AZ01	102-GC-AZ01	2020-06-03 13:54:28	IPL-17O-2284	Data_146 IPL-17O-2284 102-GC-AZ01-R15-5	0	0.107219	0.00375743	-0.261319	0.00121413	-0.741779	0.125279	2377.25	0.494088	0	1	11.5155	22.0964	-0.151367	-151.367	8.39932	16.0192	-58.8112	secondary correction applied	secondary correction applied	mineral + 1-pt normalization applied to D17O for data.cor[[3]] using IAEA-603 and/or IAEA-C1 as calcite. Offset=46.89 per meg
15	2285	CarbonateStd	102-GC-AZ01	102-GC-AZ01	2020-06-03 16:06:22	IPL-17O-2285	Data_147 IPL-17O-2285 102-GC-AZ01-R15-6	0	0.22718	0.00386347	-0.0476258	0.00103192	-0.505553	0.130956	3018.11	0.416601	0	1	11.6464	22.3289	-0.14329	-143.29	8.55269	16.2944	-50.734	secondary correction applied	secondary correction applied	mineral + 1-pt normalization applied to D17O for data.cor[[3]] using IAEA-603 and/or IAEA-C1 as calcite. Offset=46.89 per meg
15	2287	CarbonateStd	IAEA-603	IAEA-603	2020-06-04 11:37:42	IPL-17O-2287	Data_149 IPL-17O-2287 IAEA-603-R15-2	0	4.59576	0.00401493	8.35466	0.0013562	8.62556	0.117221	2979.69	1.83248	0	1	16.4014	31.4321	-0.194743	-194.743	14.1875	27.0639	-102.187	secondary correction applied	secondary correction applied	mineral + 1-pt normalization applied to D17O for data.cor[[3]] using IAEA-603 and/or IAEA-C1 as calcite. Offset=46.89 per meg
15	2288	CarbonateStd	IAEA-C1	IAEA-C1	2020-06-04 14:28:26	IPL-17O-2288	Data_150 IPL-17O-2288 IAEA-C1-R15-1	0	5.48159	0.00383307	10.0369	0.00124617	11.0543	0.0945335	2950.39	0.553055	0	1	17.3628	33.2447	-0.190369	-190.369	15.3242	29.2083	-97.8128	secondary correction applied	secondary correction applied	mineral + 1-pt normalization applied to D17O for data.cor[[3]] using IAEA-603 and/or IAEA-C1 as calcite. Offset=46.89 per meg
15	2301	CarbonateStd	102-GC-AZ01	102-GC-AZ01	2020-06-09 10:34:20	IPL-17O-2301	Data_164 IPL-17O-2301 102-GC-AZ01-R15-8	0	0.0258728	0.00439892	-0.392389	0.00176542	-2.85134	0.123598	2412.3	0.852912	0	1	11.4267	21.9536	-0.164793	-164.793	8.29676	15.8504	-72.2372	secondary correction applied	secondary correction applied	mineral + 1-pt normalization applied to D17O for data.cor[[3]] using IAEA-603 and/or IAEA-C1 as calcite. Offset=46.89 per meg
15	2302	CarbonateStd	ETH-2	ETH-2	2020-06-09 12:58:14	IPL-17O-2302	Data_165 IPL-17O-2302 ETH-2-R15-4	0	-1.68745	0.00477814	-3.73624	0.00135133	-6.84248	0.122083	3069.99	0.477649	0	1	9.55526	18.3063	-0.110487	-110.487	6.07276	11.5354	-17.9314	secondary correction applied	secondary correction applied	mineral + 1-pt normalization applied to D17O for data.cor[[3]] using IAEA-603 and/or IAEA-C1 as calcite. Offset=46.89 per meg
15	2303	CarbonateStd	ETH-2	ETH-2	2020-06-09 15:24:27	IPL-17O-2303	Data_166 IPL-17O-2303 ETH-2-R15-5	0	-1.63854	0.0035361	-3.61475	0.00128678	-6.96056	0.103795	2529.9	0.860037	0	1	9.60874	18.4391	-0.127103	-127.103	6.13907	11.6924	-34.5473	secondary correction applied	secondary correction applied	mineral + 1-pt normalization applied to D17O for data.cor[[3]] using IAEA-603 and/or IAEA-C1 as calcite. Offset=46.89 per meg
15	2310	CarbonateStd	IAEA-C1	IAEA-C1	2020-07-09 14:53:28	IPL-17O-2310	Data_172 IPL-17O-2310 IAEA-C1-R15-4	0	6.55782	0.00381236	12.1253	0.00129279	15.1617	0.123232	437.891	0.0847425	0	2	18.1109	34.5577	-0.135535	-135.535	15.5328	29.5952	-93.4422	secondary correction applied	secondary correction applied	mineral + 1-pt normalization applied to D17O for data.cor[[6]] using IAEA-603 and/or IAEA-C1 as calcite. Offset=-3.57 per meg
15	2311	CarbonateStd	IAEA-603	IAEA-603	2020-07-13 14:12:15	IPL-17O-2311	Data_173 IPL-17O-2311 IAEA 603(?)	0	4.35931	0.00439732	7.96502	0.00229282	9.93938	0.142789	545.885	0.498752	0	2	15.7661	30.1499	-0.153061	-153.061	13.0476	24.9215	-110.969	secondary correction applied	secondary correction applied	mineral + 1-pt normalization applied to D17O for data.cor[[6]] using IAEA-603 and/or IAEA-C1 as calcite. Offset=-3.57 per meg
15	2312	CarbonateStd	IAEA-603	IAEA-603	2020-07-14 12:00:13	IPL-17O-2312	Data_174 IPL-17O-2312 IAEA-603-R15-6	0	5.05249	0.00358078	9.28378	0.00136522	11.5818	0.139014	416.577	0.366349	0	2	16.4727	31.4862	-0.152001	-152.001	13.7968	26.3384	-109.909	secondary correction applied	secondary correction applied	mineral + 1-pt normalization applied to D17O for data.cor[[6]] using IAEA-603 and/or IAEA-C1 as calcite. Offset=-3.57 per meg
15	2314	WaterStd	SLAP	SLAP	2020-07-14 16:06:59	IPL-17O-2314	Data_176 IPL-17O-2314 SLAP2-B6-R15-6	2	-38.8127	0.00457042	-72.8575	0.00142657	-96.2435	0.111213	313.259	0.0858514	0	2	-30.1859	-57.1508	-0.0103051	-10.3051	-30.1859	-57.1508	-10.3051	no correction	no correction	no correction
15	2315	WaterStd	SLAP	SLAP	2020-07-14 17:58:36	IPL-17O-2315	Data_177 IPL-17O-2315 SLAP2-B6-R15-7	0	-38.7342	0.00426154	-72.7246	0.00259582	-96.7404	0.145527	340.049	0.116654	0	2	-30.1016	-57.0031	-0.00397128	-3.97128	-30.1016	-57.0031	-3.97128	no correction	no correction	no correction
15	2316	WaterStd	SLAP	SLAP	2020-07-15 10:53:42	IPL-17O-2316	Data_178 IPL-17O-2316 SLAP2-B6-R15-8	0	-38.1129	0.0053804	-71.5703	0.00477047	-94.8448	0.156061	408.265	0.322672	0	2	-29.4363	-55.7223	-0.0149097	-14.9097	-29.4363	-55.7223	-14.9097	no correction	no correction	no correction
15	2317	WaterStd	SLAP	SLAP	2020-07-15 12:49:46	IPL-17O-2317	Data_179 IPL-17O-2317 SLAP2-B6-R15-9	0	-38.7088	0.00441591	-72.6771	0.00130227	-96.7572	0.135311	400.543	0.113039	0	2	-30.0861	-56.9724	-0.00466436	-4.66436	-30.0861	-56.9724	-4.66436	no correction	no correction	no correction
15	2318	WaterStd	SMOW	SMOW	2020-07-15 15:08:10	IPL-17O-2318	Data_180 IPL-17O-2318 SMOW2-B5-R15-5	2	-10.8037	0.004533	-20.9797	0.00137492	-29.105	0.120592	406.029	0.069378	0	2	-0.159568	-0.294956	-0.00383134	-3.83134	-0.159568	-0.294956	-3.83134	no correction	no correction	no correction
15	2319	WaterStd	SMOW	SMOW	2020-07-15 17:08:17	IPL-17O-2319	Data_181 IPL-17O-2319 SMOW2-B5-R15-6	0	-10.702	0.00381035	-20.8009	0.00136767	-29.1329	0.123115	837.386	0.107345	0	2	-0.0533792	-0.106798	0.00301033	3.01033	-0.0533792	-0.106798	3.01033	no correction	no correction	no correction
15	2320	WaterStd	SMOW	SMOW	2020-07-15 19:03:09	IPL-17O-2320	Data_182 IPL-17O-2320 SMOW2-B5-R15-7	0	-10.6419	0.0039529	-20.6837	0.00117608	-29.2764	0.15643	430.483	0.0915083	0	2	0.00881971	0.0158086	0.000472746	0.472746	0.00881971	0.0158086	0.472746	no correction	no correction	no correction
15	2321	WaterStd	SMOW	SMOW	2020-07-16 09:28:11	IPL-17O-2321	Data_183 IPL-17O-2321 VSMOW2-B5-R15-8	0	-10.4431	0.00384602	-20.3101	0.00264109	-28.7202	0.169756	440.695	0.284916	0	2	0.209605	0.396298	0.000359822	0.359822	0.209605	0.396298	0.359822	no correction	no correction	no correction
15	2323	CarbonateStd	ETH-2	ETH-2	2020-07-16 17:59:56	IPL-17O-2323	Data_185 IPL-17O-2323 ETH-2-R15-7	0	-1.74842	0.00359368	-3.79498	0.00157701	-6.99008	0.136862	389.875	0.13797	0	2	9.34552	17.8239	-0.0654938	-65.4938	6.23453	11.8521	-23.4014	secondary correction applied	secondary correction applied	mineral + 1-pt normalization applied to D17O for data.cor[[6]] using IAEA-603 and/or IAEA-C1 as calcite. Offset=-3.57 per meg
15	2324	CarbonateStd	ETH-2	ETH-2	2020-07-17 11:27:07	IPL-17O-2324	Data_186 IPL-17O-2324 ETH-2-R15-8	0	-2.23184	0.00373621	-4.70913	0.00150314	-8.498	0.108019	402.983	0.370437	0	2	8.82826	16.8454	-0.0661326	-66.1326	5.68611	10.8147	-24.0403	secondary correction applied	secondary correction applied	mineral + 1-pt normalization applied to D17O for data.cor[[6]] using IAEA-603 and/or IAEA-C1 as calcite. Offset=-3.57 per meg
15	2326	CarbonateStd	102-GC-AZ01	102-GC-AZ01	2020-07-17 17:34:38	IPL-17O-2326	Data_188 IPL-17O-2326 102-GC-AZ01-R15-10	0	0.889942	0.00419996	1.27479	0.00119203	0.128297	0.146583	370.635	0.0791007	0	2	12.0879	23.088	-0.102574	-102.574	9.14451	17.4337	-60.4814	secondary correction applied	secondary correction applied	mineral + 1-pt normalization applied to D17O for data.cor[[6]] using IAEA-603 and/or IAEA-C1 as calcite. Offset=-3.57 per meg
15	2328	CarbonateStd	IAEA-603	IAEA-603	2020-07-20 13:33:37	IPL-17O-2328	Data_190 IPL-17O-2328 IAEA-603-R15-8	0	6.54327	0.00478976	12.106	0.00129373	13.1919	0.138866	390.765	0.159149	0	2	17.9273	34.2201	-0.140851	-140.851	15.3385	29.2372	-98.7591	secondary correction applied	secondary correction applied	mineral + 1-pt normalization applied to D17O for data.cor[[6]] using IAEA-603 and/or IAEA-C1 as calcite. Offset=-3.57 per meg
15	2329	CarbonateStd	IAEA-C1	IAEA-C1	2020-07-20 15:48:51	IPL-17O-2329	Data_191 IPL-17O-2329 IAEA-C1-R15-5	0	6.76713	0.00414263	12.5404	0.00131945	14.4263	0.139591	440.296	0.124923	0	2	18.1581	34.6645	-0.144693	-144.693	15.5834	29.7084	-102.601	secondary correction applied	secondary correction applied	mineral + 1-pt normalization applied to D17O for data.cor[[6]] using IAEA-603 and/or IAEA-C1 as calcite. Offset=-3.57 per meg
15	2330	CarbonateStd	IAEA-603	IAEA-603	2020-07-21 10:55:51	IPL-17O-2330	Data_192 IPL-17O-2330 IAEA-603-R15-9	0	6.14508	0.00534118	11.3521	0.00201997	12.3137	0.136323	466.922	0.316849	0	2	17.5004	33.4177	-0.144129	-144.129	14.886	28.3864	-102.037	secondary correction applied	secondary correction applied	mineral + 1-pt normalization applied to D17O for data.cor[[6]] using IAEA-603 and/or IAEA-C1 as calcite. Offset=-3.57 per meg
15	2343	CarbonateStd	102-GC-AZ01	102-GC-AZ01	2020-07-24 14:28:00	IPL-17O-2343	Data_202 IPL-17O-2343 102-GC-AZ01-R15-12	0	0.489787	0.00448249	0.528059	0.00125549	-0.733525	0.133949	389.882	0.298741	0	2	11.5643	22.1106	-0.110043	-110.043	8.58987	16.3974	-67.951	secondary correction applied	secondary correction applied	mineral + 1-pt normalization applied to D17O for data.cor[[6]] using IAEA-603 and/or IAEA-C1 as calcite. Offset=-3.57 per meg
15	2354	CarbonateStd	102-GC-AZ01	102-GC-AZ01	2020-08-04 15:16:15	IPL-17O-2354	Data_212 IPL-17O-2354 102-GC-AZ01-R15-13	0	0.119262	0.00490594	-0.1878	0.00138678	-4.04991	0.131	288.332	0.209735	0	2	11.0075	21.044	-0.103686	-103.686	7.99909	15.2664	-61.5941	secondary correction applied	secondary correction applied	mineral + 1-pt normalization applied to D17O for data.cor[[6]] using IAEA-603 and/or IAEA-C1 as calcite. Offset=-3.57 per meg
15	2363	WaterStd	SMOW	SMOW	2020-08-11 12:05:44	IPL-17O-2363	Data_221 IPL-17O-2363 VSMOW2-B5-R15-9	2	-10.1896	0.00420878	-19.8446	0.00145415	-33.6275	0.122881	481.139	0.148843	0	2	0.075139	0.133203	0.00480784	4.80784	0.075139	0.133203	4.80784	no correction	no correction	no correction
15	2364	WaterStd	SMOW	SMOW	2020-08-11 13:55:32	IPL-17O-2364	Data_222 IPL-17O-2364 VSMOW2-B5-R15-10	0	-10.3228	0.00427545	-20.0908	0.00115396	-33.7895	0.12781	401.584	0.134195	0	2	-0.0666726	-0.131191	0.00259633	2.59633	-0.0666726	-0.131191	2.59633	no correction	no correction	no correction
15	2365	WaterStd	SMOW	SMOW	2020-08-11 16:01:29	IPL-17O-2365	Data_223 IPL-17O-2365 VSMOW2-B5-R15-11	0	-10.2527	0.00475995	-19.9453	0.00121422	-28.1878	0.132216	458.779	0.120202	0	2	0.00597995	0.0211667	-0.00519607	-5.19607	0.00597995	0.0211667	-5.19607	no correction	no correction	no correction
15	2366	WaterStd	SMOW	SMOW	2020-08-11 17:50:19	IPL-17O-2366	Data_224 IPL-17O-2366 VSMOW2-B5-R15-12	0	-10.2762	0.00379304	-19.9948	0.00146811	-28.05	0.14568	476.091	0.129395	0	2	-0.0199655	-0.0336771	-0.00218393	-2.18393	-0.0199655	-0.0336771	-2.18393	no correction	no correction	no correction
15	2367	WaterStd	SLAP	SLAP	2020-08-17 11:20:26	IPL-17O-2367	Data_225 IPL-17O-2367 SLAP2-B6-R15-10	2	-38.4504	0.00847313	-72.188	0.0117167	-99.3167	0.135502	311.848	0.370973	0	2	-30.3127	-57.3805	-0.0158207	-15.8207	-30.3127	-57.3805	-15.8207	no correction	no correction	no correction
15	2368	WaterStd	SLAP	SLAP	2020-08-17 13:11:47	IPL-17O-2368	Data_226 IPL-17O-2368 SLAP2-B6-R15-11	0	-38.4959	0.00496267	-72.2839	0.00217054	-101.954	0.11121	326.589	0.185083	0	2	-30.3635	-57.4908	-0.00832916	-8.32916	-30.3635	-57.4908	-8.32916	no correction	no correction	no correction
15	2369	WaterStd	SLAP	SLAP	2020-08-17 15:11:09	IPL-17O-2369	Data_227 IPL-17O-2369 SLAP2-B6-R15-12	0	-38.3772	0.0039475	-72.0529	0.00119789	-100.213	0.134132	487.063	0.118963	0	2	-30.2355	-57.2329	-0.0165789	-16.5789	-30.2355	-57.2329	-16.5789	no correction	no correction	no correction
15	2370	WaterStd	SLAP	SLAP	2020-08-17 17:09:49	IPL-17O-2370	Data_228 IPL-17O-2370 SLAP2-B6-R15-13	0	-38.6698	0.00513909	-72.5938	0.00129102	-102.137	0.157286	405.618	0.115013	0	2	-30.5554	-57.8452	-0.0130798	-13.0798	-30.5554	-57.8452	-13.0798	no correction	no correction	no correction
15	2375	CarbonateStd	102-GC-AZ01	102-GC-AZ01	2020-08-18 18:50:40	IPL-17O-2375	Data_231 IPL-17O-2375 102-GC-AZ01-R15-17	0	0.873298	0.00361922	1.24964	0.00110894	-0.198619	0.129393	411.615	0.0858455	0	2	11.5771	22.1311	-0.108144	-108.144	8.60325	16.4191	-66.0513	secondary correction applied	secondary correction applied	mineral + 1-pt normalization applied to D17O for data.cor[[6]] using IAEA-603 and/or IAEA-C1 as calcite. Offset=-3.57 per meg
15	2397	Carbonate	Julia's Samples	Goler3	2020-08-26 19:13:37	IPL-17O-2397	Data_252 IPL-17O-2397 Goler3-R15-1	0	4.49333	0.00419677	8.16715	0.00122163	9.99021	0.136284	495.495	0.16571	0	2	15.225	29.0757	-0.126952	-126.952	12.4723	23.7826	-84.8595	secondary correction applied	secondary correction applied	mineral + 1-pt normalization applied to D17O for data.cor[[6]] using IAEA-603 and/or IAEA-C1 as calcite. Offset=-3.57 per meg
15	2398	Carbonate	Julia's Samples	Goler3	2020-08-27 10:07:27	IPL-17O-2398	Data_253 IPL-17O-2398 Goler3-R15-2	0	3.50616	0.00410344	6.28824	0.00193695	7.20891	0.155028	398.978	0.273004	0	2	14.1885	27.1133	-0.127379	-127.379	11.3733	21.7018	-85.2864	secondary correction applied	secondary correction applied	mineral + 1-pt normalization applied to D17O for data.cor[[6]] using IAEA-603 and/or IAEA-C1 as calcite. Offset=-3.57 per meg
15	2406	CarbonateStd	102-GC-AZ01	102-GC-AZ01	2020-08-31 15:15:01	IPL-17O-2406	Data_261 IPL-17O-2406 102-GC-AZ01-R15-19	0	0.79108	0.00546688	1.09151	0.00564594	0.425239	0.145936	337.21	0.139918	0	2	11.2935	21.5936	-0.107885	-107.885	8.30256	15.8492	-65.7927	secondary correction applied	secondary correction applied	mineral + 1-pt normalization applied to D17O for data.cor[[6]] using IAEA-603 and/or IAEA-C1 as calcite. Offset=-3.57 per meg
15	2407	CarbonateStd	102-GC-AZ01	102-GC-AZ01	2020-08-31 17:32:37	IPL-17O-2407	Data_262 IPL-17O-2407 102-GC-AZ01-R15-20 1	0	0.879864	0.00419471	1.2354	0.00191095	0.796094	0.137788	343.439	0.136822	0	2	11.3847	21.7406	-0.0943377	-94.3377	8.39845	16.0051	-52.2454	secondary correction applied	secondary correction applied	mineral + 1-pt normalization applied to D17O for data.cor[[6]] using IAEA-603 and/or IAEA-C1 as calcite. Offset=-3.57 per meg
15	2409	CarbonateStd	IAEA-603	IAEA-603	2020-09-01 12:18:25	IPL-17O-2409	Data_264 IPL-17O-2409 IAEA-603-R15-10	0	6.92794	0.00391819	12.8228	0.00128026	17.0026	0.121575	350.029	0.101265	0	2	17.6655	33.7116	-0.13423	-134.23	15.0605	28.6981	-92.138	secondary correction applied	secondary correction applied	mineral + 1-pt normalization applied to D17O for data.cor[[6]] using IAEA-603 and/or IAEA-C1 as calcite. Offset=-3.57 per meg
15	2410	CarbonateStd	IAEA-603	IAEA-603	2020-09-01 15:41:54	IPL-17O-2410	Data_265 IPL-17O-2410 IAEA-603-R15-11	0	6.87172	0.00456882	12.7118	0.00148903	16.8667	0.112431	423.801	0.0814758	0	2	17.605	33.5933	-0.132237	-132.237	14.9962	28.5726	-90.1445	secondary correction applied	secondary correction applied	mineral + 1-pt normalization applied to D17O for data.cor[[6]] using IAEA-603 and/or IAEA-C1 as calcite. Offset=-3.57 per meg
15	2411	CarbonateStd	ETH-1	ETH-1	2020-09-01 18:01:47	IPL-17O-2411	Data_266 IPL-17O-2411 ETH-1-R15-1	0	7.2499	0.00369716	13.4388	0.001271	17.4583	0.142395	455.357	0.113827	0	2	17.9957	34.3383	-0.134886	-134.886	15.4106	29.3625	-92.794	secondary correction applied	secondary correction applied	mineral + 1-pt normalization applied to D17O for data.cor[[6]] using IAEA-603 and/or IAEA-C1 as calcite. Offset=-3.57 per meg
16	2459	WaterStd	House DI	House DI	2020-09-28 11:26:27	IPL-17O-2459	Data_297 IPL-17O-2459 House-DI#1-R16-3	2	-13.3106	0.00538783	-25.7085	0.00416041	-38.9202	0.180154	320.173	0.401955	0	1	-2.77899	-5.30223	0.0205832	20.5832	-2.77899	-5.30223	20.5832	no correction	no correction	no correction
16	2460	WaterStd	House DI	House DI	2020-09-28 13:16:42	IPL-17O-2460	Data_298 IPL-17O-2460 House-DI#1-R16-4	0	-13.4217	0.0039089	-25.9283	0.00136721	-39.0528	0.156087	411.426	0.157521	0	1	-2.90237	-5.54865	0.0273115	27.3115	-2.90237	-5.54865	27.3115	no correction	no correction	no correction
16	2462	WaterStd	House DI	House DI	2020-09-28 17:01:00	IPL-17O-2462	Data_300 IPL-17O-2462 House-DI#1-R16-6	0	-13.5064	0.0037372	-26.1085	0.00158581	-39.2342	0.127382	528.402	0.139655	0	1	-2.9995	-5.75641	0.0398871	39.8871	-2.9995	-5.75641	39.8871	no correction	no correction	no correction
16	2463	WaterStd	House DI	House DI	2020-09-28 18:54:46	IPL-17O-2463	Data_301 IPL-17O-2463 House DI#-R16-7	0	-13.6328	0.00370522	-26.3105	0.00129133	-39.6438	0.0920733	374.919	0.105658	0	1	-3.13964	-5.9836	0.0196985	19.6985	-3.13964	-5.9836	19.6985	no correction	no correction	no correction
16	2464	WaterStd	SLAP	SLAP	2020-09-29 09:02:11	IPL-17O-2464	Data_302 IPL-17O-2464 SLAP2-B6-R16-1	2	-37.4244	0.00344985	-70.3062	0.00474586	-100.19	0.142684	447.966	0.244544	0	1	-29.4084	-55.6873	-0.00553056	-5.53056	-29.4084	-55.6873	-5.53056	no correction	no correction	no correction
16	2465	WaterStd	SLAP	SLAP	2020-09-29 10:53:12	IPL-17O-2465	Data_303 IPL-17O-2465 SLAP2-B6-R16-2	0	-37.5862	0.00324432	-70.6167	0.0011994	-101.543	0.138729	453.974	0.0738103	0	1	-29.5917	-56.0513	0.00341965	3.41965	-29.5917	-56.0513	3.41965	no correction	no correction	no correction
16	2466	WaterStd	SLAP	SLAP	2020-09-29 12:41:30	IPL-17O-2466	Data_304 IPL-17O-2466 SLAP2-B6-R16-3	0	-37.6551	0.00485432	-70.7262	0.00246768	-102.017	0.138961	413.333	0.0904685	0	1	-29.6712	-56.1827	-0.0067201	-6.7201	-29.6712	-56.1827	-6.7201	no correction	no correction	no correction
16	2467	WaterStd	SLAP	SLAP	2020-09-29 14:32:22	IPL-17O-2467	Data_305 IPL-17O-2467 SLAP2-B6-R16-4	0	-37.7979	0.003487	-70.9833	0.00134698	-102.026	0.126425	349.512	0.0742378	0	1	-29.8333	-56.4851	-0.00914745	-9.14745	-29.8333	-56.4851	-9.14745	no correction	no correction	no correction
16	2468	WaterStd	SMOW	SMOW	2020-09-29 16:28:14	IPL-17O-2468	Data_306 IPL-17O-2468 VSMOW2-B5-R16-1	2	-10.7323	0.00305913	-20.8339	0.00106805	-32.8494	0.157389	536.822	0.0936601	0	1	-0.0144392	-0.0234543	-0.00205532	-2.05532	-0.0144392	-0.0234543	-2.05532	no correction	no correction	no correction
16	2469	WaterStd	SMOW	SMOW	2020-09-29 18:20:34	IPL-17O-2469	Data_307 IPL-17O-2469 VSMOW2-B5-R16-2	0	-10.6938	0.00391376	-20.7813	0.00111638	-32.0492	0.146178	603.888	0.0997164	0	1	0.0248148	0.0294944	0.00924172	9.24173	0.0248148	0.0294944	9.24173	no correction	no correction	no correction
16	2470	WaterStd	SMOW	SMOW	2020-09-30 10:29:31	IPL-17O-2470	Data_308 IPL-17O-2470 VSMOW2-B5-R16-3	0	-10.8299	0.00358808	-21.0337	0.00158405	-33.2999	0.151936	563.441	0.302582	0	1	-0.14416	-0.287029	0.00739055	7.39055	-0.14416	-0.287029	7.39055	no correction	no correction	no correction
16	2471	WaterStd	SMOW	SMOW	2020-09-30 12:19:54	IPL-17O-2471	Data_309 IPL-17O-2471 VSMOW2-B5-R16-4	0	-10.5757	0.0119124	-20.5179	0.0103515	-33.2972	0.154778	430.63	0.144957	0	1	0.129356	0.273108	-0.0148447	-14.8447	0.129356	0.273108	-14.8447	no correction	no correction	no correction
16	2475	CarbonateStd	IAEA-C1	IAEA-C1	2020-10-01 19:33:54	IPL-17O-2475	Data_311 IPL-17O-2475 IAEA-C1-R16-2	0	6.2096	0.0034163	11.4738	0.00155762	15.0849	0.127771	589.721	0.075381	0	1	18.1426	34.6081	-0.130489	-130.489	15.1831	28.9518	-103.403	secondary correction applied	secondary correction applied	mineral + 1-pt normalization applied to D17O for data.cor[[6]] using IAEA-603 and/or IAEA-C1 as calcite. Offset=-18.58 per meg
16	2476	CarbonateStd	IAEA-603	IAEA-603	2020-10-06 10:20:23	IPL-17O-2476	Data_312 IPL-17O-2476 IAEA-603-R16-1	0	4.49772	0.00409732	8.22301	0.00151351	8.89736	0.15188	386.516	0.316433	0	1	16.1704	30.8904	-0.139734	-139.734	12.9328	24.7072	-112.648	secondary correction applied	secondary correction applied	mineral + 1-pt normalization applied to D17O for data.cor[[6]] using IAEA-603 and/or IAEA-C1 as calcite. Offset=-18.58 per meg
16	2477	CarbonateStd	IAEA-603	IAEA-603	2020-10-06 12:39:42	IPL-17O-2477	Data_313 IPL-17O-2477 IAEA-603-R16-2	0	6.60024	0.00455808	12.207	0.00118033	14.7421	0.13572	529.407	0.0873959	0	1	18.4102	35.1029	-0.124194	-124.195	15.4877	29.5167	-97.1089	secondary correction applied	secondary correction applied	mineral + 1-pt normalization applied to D17O for data.cor[[6]] using IAEA-603 and/or IAEA-C1 as calcite. Offset=-18.58 per meg
16	2479	CarbonateStd	102-GC-AZ01	102-GC-AZ01	2020-10-06 17:28:12	IPL-17O-2479	Data_315 IPL-17O-2479 102-GC-AZ01-R16-2	0	1.09709	0.00405338	1.68287	0.0016315	0.156063	0.151825	506.073	0.0781466	0	1	12.5229	23.9092	-0.101219	-101.219	8.76281	16.7366	-74.1329	secondary correction applied	secondary correction applied	mineral + 1-pt normalization applied to D17O for data.cor[[6]] using IAEA-603 and/or IAEA-C1 as calcite. Offset=-18.58 per meg
16	2480	CarbonateStd	102-GC-AZ01	102-GC-AZ01	2020-10-06 19:49:28	IPL-17O-2480	Data_316 IPL-17O-2480 102-GC-AZ01-R16-3	0	1.16481	0.00329196	1.81209	0.00131136	0.404047	0.171273	540.381	0.0969794	0	1	12.5923	24.0415	-0.101548	-101.548	8.84219	16.8876	-74.4622	secondary correction applied	secondary correction applied	mineral + 1-pt normalization applied to D17O for data.cor[[6]] using IAEA-603 and/or IAEA-C1 as calcite. Offset=-18.58 per meg
16	2501	CarbonateStd	IAEA-C1	IAEA-C1	2020-10-14 17:38:44	IPL-17O-2501	Data_336 IPL-17O-2501 IAEA-C1-R16-4	0	7.22159	0.00513942	13.3936	0.00144351	17.581	0.146901	524.429	0.109481	0	1	18.813	35.8682	-0.125395	-125.395	15.9478	30.3904	-98.309	secondary correction applied	secondary correction applied	mineral + 1-pt normalization applied to D17O for data.cor[[6]] using IAEA-603 and/or IAEA-C1 as calcite. Offset=-18.58 per meg
16	2502	CarbonateStd	IAEA-603	IAEA-603	2020-10-14 19:59:34	IPL-17O-2502	Data_337 IPL-17O-2502 IAEA-603-R16-3	0	6.90708	0.0067406	12.7677	0.00127951	16.7182	0.136119	781.713	0.118089	0	1	18.4749	35.2017	-0.111534	-111.534	15.5599	29.6295	-84.4488	secondary correction applied	secondary correction applied	mineral + 1-pt normalization applied to D17O for data.cor[[6]] using IAEA-603 and/or IAEA-C1 as calcite. Offset=-18.58 per meg
16	2503	CarbonateStd	IAEA-603	IAEA-603	2020-10-15 10:02:30	IPL-17O-2503	Data_338 IPL-17O-2503 IAEA-603-R16-4	0	6.57508	0.00884613	12.1462	0.0019213	15.4389	0.121817	662.268	0.12113	0	1	18.1028	34.5104	-0.118691	-118.691	15.136	28.8402	-91.6056	secondary correction applied	secondary correction applied	mineral + 1-pt normalization applied to D17O for data.cor[[6]] using IAEA-603 and/or IAEA-C1 as calcite. Offset=-18.58 per meg
16	2505	CarbonateStd	102-GC-AZ01	102-GC-AZ01	2020-10-15 14:43:02	IPL-17O-2505	Data_340 IPL-17O-2505 102-GC-AZ01-R16-5	0	1.37573	0.00602139	2.19002	0.0013066	2.46077	0.12325	893.822	0.162456	0	1	12.541	23.9226	-0.0901636	-90.1636	8.78192	16.7519	-63.0779	secondary correction applied	secondary correction applied	mineral + 1-pt normalization applied to D17O for data.cor[[6]] using IAEA-603 and/or IAEA-C1 as calcite. Offset=-18.58 per meg
16	2506	CarbonateStd	102-GC-AZ01	102-GC-AZ01	2020-10-15 17:06:39	IPL-17O-2506	Data_341 IPL-17O-2506 102-GC-AZ01-R16-6	0	1.40891	0.00639836	2.25872	0.00145093	2.7346	0.132249	657.214	0.101032	0	1	12.5734	23.99	-0.0933643	-93.3643	8.81937	16.8289	-66.2786	secondary correction applied	secondary correction applied	mineral + 1-pt normalization applied to D17O for data.cor[[6]] using IAEA-603 and/or IAEA-C1 as calcite. Offset=-18.58 per meg
16	2507	Carbonate	Julia's Samples	19Loyalton-40	2020-10-15 19:31:07	IPL-17O-2507	Data_342 IPL-17O-2507 19Loyalton-40-R16-1	0	2.19373	0.00532684	3.75996	0.00126566	5.02765	0.113057	982.375	0.147418	0	1	13.4108	25.5858	-0.098566	-98.566	9.77618	18.6509	-71.4804	secondary correction applied	secondary correction applied	mineral + 1-pt normalization applied to D17O for data.cor[[6]] using IAEA-603 and/or IAEA-C1 as calcite. Offset=-18.58 per meg
16	2508	Carbonate	Julia's Samples	19Loyalton-40	2020-10-16 13:25:07	IPL-17O-2508	Data_343 IPL-17O-2508 19Loyalton-40-R16-2	0	1.05018	0.00477113	1.60853	0.00164346	1.17712	0.122452	867.688	0.223298	0	1	12.1622	23.2452	-0.111236	-111.236	8.35248	15.9785	-84.1503	secondary correction applied	secondary correction applied	mineral + 1-pt normalization applied to D17O for data.cor[[6]] using IAEA-603 and/or IAEA-C1 as calcite. Offset=-18.58 per meg
16	2521	CarbonateStd	102-GC-AZ01	102-GC-AZ01	2020-10-22 14:56:21	IPL-17O-2521	Data_356 IPL-17O-2521 102-GC-AZ01-R16-7	0	1.26197	0.00743275	1.984	0.00122971	2.19141	0.162471	630.04	0.0862146	0	1	12.1978	23.2859	-0.0971232	-97.1232	8.39115	16.025	-70.0375	secondary correction applied	secondary correction applied	mineral + 1-pt normalization applied to D17O for data.cor[[6]] using IAEA-603 and/or IAEA-C1 as calcite. Offset=-18.58 per meg
16	2522	CarbonateStd	102-GC-AZ01	102-GC-AZ01	2020-10-22 17:23:38	IPL-17O-2522	Data_357 IPL-17O-2522 102-GC-AZ01-R16-8	0	1.48506	0.0076223	2.40847	0.000876821	2.85871	0.142631	560.5	0.127269	0	1	12.4337	23.7331	-0.0974423	-97.4423	8.66043	16.5356	-70.3566	secondary correction applied	secondary correction applied	mineral + 1-pt normalization applied to D17O for data.cor[[6]] using IAEA-603 and/or IAEA-C1 as calcite. Offset=-18.58 per meg
16	2523	CarbonateStd	102-GC-AZ01	102-GC-AZ01	2020-10-23 13:33:07	IPL-17O-2523	Data_358 IPL-17O-2523 102-GC-AZ01-R16-9	0	0.210479	0.00531423	-0.0143696	0.00122549	-1.29565	0.135825	456.366	0.105832	0	1	11.0406	21.093	-0.0964745	-96.4745	7.06985	13.5213	-69.3888	secondary correction applied	secondary correction applied	mineral + 1-pt normalization applied to D17O for data.cor[[6]] using IAEA-603 and/or IAEA-C1 as calcite. Offset=-18.58 per meg
16	2525	CarbonateStd	IAEA-C1	IAEA-C1	2020-10-23 17:57:42	IPL-17O-2525	Data_360 IPL-17O-2525 IAEA-C1-R16-6	0	6.04481	0.00524921	11.1374	0.00125	15.4526	0.126407	393.075	0.06881	0	1	17.2748	32.949	-0.122309	-122.309	14.1912	27.0575	-95.2235	secondary correction applied	secondary correction applied	mineral + 1-pt normalization applied to D17O for data.cor[[6]] using IAEA-603 and/or IAEA-C1 as calcite. Offset=-18.58 per meg
16	2526	CarbonateStd	IAEA-C1	IAEA-C1	2020-10-27 10:12:26	IPL-17O-2526	Data_361 IPL-17O-2526 IAEA-603-R16-7	0	4.98669	0.00506736	9.15393	0.00152109	11.0785	0.12883	793.882	0.236098	0	1	16.03	30.6302	-0.142782	-142.782	12.7729	24.4102	-115.696	secondary correction applied	secondary correction applied	mineral + 1-pt normalization applied to D17O for data.cor[[6]] using IAEA-603 and/or IAEA-C1 as calcite. Offset=-18.58 per meg
16	2527	CarbonateStd	IAEA-C1	IAEA-C1	2020-10-27 12:31:24	IPL-17O-2527	Data_362 IPL-17O-2527 IAEA-603-R16-8	0	6.99514	0.0058456	12.9624	0.00123136	16.9674	0.150704	964.302	0.156893	0	1	18.1685	34.6536	-0.128643	-128.643	15.2124	29.0037	-101.557	secondary correction applied	secondary correction applied	mineral + 1-pt normalization applied to D17O for data.cor[[6]] using IAEA-603 and/or IAEA-C1 as calcite. Offset=-18.58 per meg
16	2529	WaterStd	SMOW	SMOW	2020-10-27 16:18:50	IPL-17O-2529	Data_363 IPL-17O-2529 VSMOW-B5-R16-5	2	-9.7853	0.00498653	-19.071	0.00132448	-29.5232	0.13629	643.846	0.0949591	0	1	0.128643	0.237694	0.00314063	3.14063	0.128643	0.237694	3.14063	no correction	no correction	no correction
16	2530	WaterStd	SMOW	SMOW	2020-10-27 18:12:54	IPL-17O-2530	Data_364 IPL-17O-2530 VSMOW-B5-R16-6	0	-9.8895	0.0048174	-19.2608	0.00116073	-30.1762	0.132146	856.895	0.165034	0	1	0.013134	0.0254849	-0.000322007	-0.322007	0.013134	0.0254849	-0.322007	no correction	no correction	no correction
16	2531	WaterStd	SMOW	SMOW	2020-10-28 11:04:24	IPL-17O-2531	Data_365 IPL-17O-2531 VSMOW-B5-R16-7	0	-9.79226	0.00484215	-19.079	0.00157219	-29.8641	0.132689	1045.46	0.214791	0	1	0.0964194	0.18238	0.000123009	0.123009	0.0964194	0.18238	0.123009	no correction	no correction	no correction
16	2532	WaterStd	SMOW	SMOW	2020-10-28 12:53:39	IPL-17O-2532	Data_366 IPL-17O-2532 VSMOW-B5-R16-8	0	-10.0945	0.00503598	-19.6423	0.00117747	-30.8865	0.144542	786.531	0.104738	0	1	-0.233827	-0.437899	-0.00261709	-2.61709	-0.233827	-0.437899	-2.61709	no correction	no correction	no correction
16	2533	WaterStd	SLAP	SLAP	2020-10-28 14:54:15	IPL-17O-2533	Data_367 IPL-17O-2533 SLAP2-B6-R16-5	2	-37.8905	0.00389203	-71.1339	0.00115454	-104.719	0.118888	599.997	0.0797702	0	1	-30.8555	-58.3943	-0.0232831	-23.2831	-30.8555	-58.3943	-23.2831	no correction	no correction	no correction
16	2534	WaterStd	SLAP	SLAP	2020-10-28 16:42:21	IPL-17O-2534	Data_368 IPL-17O-2534 SLAP2-B6-R16-6	0	-37.8492	0.00513649	-71.0952	0.00275752	-104.355	0.140328	839.751	0.141527	0	1	-30.8117	-58.3539	-0.000880239	-0.880239	-30.8117	-58.3539	-0.880239	no correction	no correction	no correction
16	2535	WaterStd	SLAP	SLAP	2020-10-28 18:34:55	IPL-17O-2535	Data_369 IPL-17O-2535 SLAP2-B6-R16-7	0	-37.8288	0.00483949	-71.0368	0.00186423	-104.112	0.141717	917.453	0.197351	0	1	-30.7913	-58.2909	-0.0136956	-13.6956	-30.7913	-58.2909	-13.6956	no correction	no correction	no correction
16	2536	WaterStd	SLAP	SLAP	2020-10-29 08:28:00	IPL-17O-2536	Data_370 IPL-17O-2536 SLAP2-B6-R16-8	0	-37.3864	0.00457238	-70.1994	0.0031306	-104.033	0.161828	796.767	0.266534	0	1	-30.3149	-57.3558	-0.0310567	-31.0567	-30.3149	-57.3558	-31.0567	no correction	no correction	no correction
16	2539	WaterStd	USGS46	USGS46	2020-10-29 14:10:41	IPL-17O-2539	Data_373 IPL-17O-2539 USGS-46-R16-1	2	-25.3943	0.00393788	-48.1995	0.00163685	-70.7715	0.146553	769.191	0.107296	0	1	-17.0047	-32.2249	0.0100907	10.0907	-17.0047	-32.2249	10.0907	no correction	no correction	no correction
16	2540	WaterStd	USGS46	USGS46	2020-10-29 16:02:00	IPL-17O-2540	Data_374 IPL-17O-2540 USGS-46-R16-2	0	-25.3935	0.00431068	-48.2168	0.000936214	-70.3873	0.13592	670.477	0.0912631	0	1	-17.0062	-32.249	0.021261	21.261	-17.0062	-32.249	21.261	no correction	no correction	no correction
16	2566	WaterStd	USGS46	USGS46	2020-11-05 19:41:08	IPL-17O-2566	Data_399 IPL-17O-2566 USGS 46-R16-3	2	-25.2161	0.00409528	-47.8928	0.00106156	-66.6741	0.131644	559.467	0.141704	0	2	-15.5511	-29.4769	0.012758	12.758	-15.5511	-29.4769	12.758	no correction	no correction	no correction
16	2567	WaterStd	USGS46	USGS46	2020-11-06 10:01:06	IPL-17O-2567	Data_400 IPL-17O-2567 USGS 46-R16-4	0	-25.2406	0.00471724	-47.95	0.00128451	-66.6038	0.142553	507.62	0.161302	0	2	-15.5781	-29.5412	0.0196969	19.6969	-15.5781	-29.5412	19.6969	no correction	no correction	no correction
16	2571	WaterStd	SMOW	SMOW	2020-11-07 08:43:05	IPL-17O-2571	Data_403 IPL-17O-2571 VSMOW2-B5-R16-14	2	-10.6758	0.00343163	-20.7519	0.00146449	-29.4889	0.137024	635.9	0.334435	0	2	0.306367	0.570341	0.00522711	5.2271	0.306367	0.570341	5.2271	no correction	no correction	no correction
16	2572	WaterStd	SMOW	SMOW	2020-11-07 11:04:40	IPL-17O-2572	Data_404 IPL-17O-2572 VSMOW2-B5-R16-15	2	-10.7856	0.00383775	-20.9659	0.00118791	-30.1925	0.166676	563.478	0.106727	0	2	0.187608	0.336881	0.00973516	9.73516	0.187608	0.336881	9.73516	no correction	no correction	no correction
16	2573	WaterStd	SLAP	SLAP	2020-11-09 11:42:22	IPL-17O-2573	Data_405 IPL-17O-2573 SLAP2-B6-R16-13	2	-38.4097	0.004415	-72.1375	0.00341864	-99.9885	0.168932	280.79	0.237875	0	2	-30.1607	-57.1032	-0.0102114	-10.2114	-30.1607	-57.1032	-10.2114	no correction	no correction	no correction
16	2574	WaterStd	SLAP	SLAP	2020-11-09 13:37:53	IPL-17O-2574	Data_406 IPL-17O-2574 SLAP2-B6-R16-14	0	-38.237	0.00499816	-71.8325	0.00285003	-100.387	0.120038	356.064	0.11041	0	2	-29.9681	-56.7509	-0.00361228	-3.61228	-29.9681	-56.7509	-3.61228	no correction	no correction	no correction
16	2575	WaterStd	SLAP	SLAP	2020-11-09 16:30:59	IPL-17O-2575	Data_408 IPL-17O-2575 SLAP2-B6-R16-15 2	0	-38.3173	0.00405352	-71.9591	0.00293094	-101.172	0.149066	380.234	0.105775	0	2	-30.0576	-56.8971	-0.0159832	-15.9832	-30.0576	-56.8971	-15.9832	no correction	no correction	no correction
16	2576	WaterStd	SLAP	SLAP	2020-11-09 18:19:17	IPL-17O-2576	Data_409 IPL-17O-2576 SLAP2-B6-R16-16	0	-38.6707	0.0034059	-72.6084	0.00241619	-102.744	0.118264	274.016	0.0856476	0	2	-30.452	-57.6474	-0.0141373	-14.1373	-30.452	-57.6474	-14.1373	no correction	no correction	no correction
16	2577	WaterStd	SMOW	SMOW	2020-11-09 20:10:24	IPL-17O-2577	Data_410 IPL-17O-2577 VSMOW2-B5-R16-16	2	-11.403	0.00333772	-22.0832	0.00349195	-32.8502	0.130256	481.81	0.111078	0	2	-0.480685	-0.882696	-0.0146209	-14.6209	-0.480685	-0.882696	-14.6209	no correction	no correction	no correction
16	2578	WaterStd	SMOW	SMOW	2020-11-10 08:44:34	IPL-17O-2578	Data_411 IPL-17O-2578 VSMOW2-B5-R16-17	0	-11.4261	0.00402053	-22.1303	0.00319913	-32.7581	0.132702	406.737	0.154395	0	2	-0.505744	-0.93418	-0.0124968	-12.4968	-0.505744	-0.93418	-12.4968	no correction	no correction	no correction
16	2579	WaterStd	SMOW	SMOW	2020-11-10 10:34:05	IPL-17O-2579	Data_412 IPL-17O-2579 VSMOW2-B5-R16-18	0	-10.8037	0.00474074	-21.0013	0.00680239	-31.3755	0.124384	401.77	0.0880136	0	2	0.167956	0.29822	0.0104956	10.4956	0.167956	0.29822	10.4956	no correction	no correction	no correction
16	2580	WaterStd	SMOW	SMOW	2020-11-10 12:23:13	IPL-17O-2580	Data_413 IPL-17O-2580 VSMOW2-B5-R16-19	0	-10.6594	0.00405402	-20.7153	0.00113134	-31.339	0.153088	421.991	0.0961316	0	2	0.324122	0.610158	0.00195885	1.95885	0.324122	0.610158	1.95885	no correction	no correction	no correction
16	2590	WaterStd	SMOW	SMOW	2020-11-17 09:23:06	IPL-17O-2590	Data_437 IPL-17O-2590 VSMOW2-B5-R16-20	2	-10.6041	0.0036027	-20.6268	0.000991295	-29.3258	0.150953	526.109	0.346909	0	3	-0.0571279	-0.1009	-0.00385255	-3.85255	-0.0571279	-0.1009	-3.85255	no correction	no correction	no correction
16	2591	WaterStd	SMOW	SMOW	2020-11-17 11:11:43	IPL-17O-2591	Data_438 IPL-17O-2591 VSMOW2-B5-R16-21	0	-10.6199	0.00398014	-20.6691	0.00144083	-29.2098	0.131972	594.187	0.225069	0	3	-0.0748459	-0.148344	0.00347958	3.47958	-0.0748459	-0.148344	3.47958	no correction	no correction	no correction
16	2592	WaterStd	SMOW	SMOW	2020-11-17 13:00:49	IPL-17O-2592	Data_439 IPL-17O-2592 VSMOW2-B5-R16-22	0	-10.5012	0.00354566	-20.4507	0.00114318	-29.5888	0.122485	540.879	0.125897	0	3	0.053561	0.0897447	0.00617578	6.17578	0.053561	0.0897447	6.17578	no correction	no correction	no correction
16	2593	WaterStd	SMOW	SMOW	2020-11-17 14:49:15	IPL-17O-2593	Data_440 IPL-17O-2593 VSMOW2-B5-R16-23	0	-10.4624	0.00367317	-20.3616	0.00114972	-29.4222	0.12186	570.457	0.0998252	0	3	0.0950682	0.186186	-0.00323801	-3.23801	0.0950682	0.186186	-3.23801	no correction	no correction	no correction
16	2594	WaterStd	SLAP	SLAP	2020-11-17 16:39:22	IPL-17O-2594	Data_441 IPL-17O-2594 SLAP2-B6-R16-17	2	-37.8078	0.00341601	-71.0525	0.0012117	-98.8895	0.14144	502.329	0.0844956	0	3	-30.0532	-56.9286	0.00507879	5.07879	-30.0532	-56.9286	5.07879	no correction	no correction	no correction
16	2595	WaterStd	SLAP	SLAP	2020-11-17 18:27:17	IPL-17O-2595	Data_442 IPL-17O-2595 VSLAP2-B6-R16-18 1	0	-37.8895	0.00395142	-71.1939	0.00148776	-99.0745	0.163194	609.246	0.0995801	0	3	-30.1452	-57.0936	0.000225222	0.225222	-30.1452	-57.0936	0.225222	no correction	no correction	no correction
16	2596	WaterStd	SLAP	SLAP	2020-11-18 10:53:37	IPL-17O-2596	Data_446 IPL-17O-2596 SLAP2-B6-R16-19	0	-38.3987	0.00476675	-72.1247	0.00144497	-101.482	0.176634	586.137	0.336035	0	3	-30.7205	-58.1841	0.000693368	0.693368	-30.7205	-58.1841	0.693368	no correction	no correction	no correction
16	2597	WaterStd	SLAP	SLAP	2020-11-18 12:45:43	IPL-17O-2597	Data_447 IPL-17O-2597 SLAP2-B6-R16-20	0	-38.4762	0.00343222	-72.2852	0.00112285	-101.623	0.126168	550.353	0.133893	0	3	-30.8079	-58.3716	0.012324	12.324	-30.8079	-58.3716	12.324	no correction	no correction	no correction
16	2618	WaterStd	USGS46	USGS46	2020-11-24 10:35:18	IPL-17O-2618	Data_468 IPL-17O-2618 USGS 46-R16-5	2	-24.9809	0.00436875	-47.4513	0.00139289	-68.6633	0.133686	641.343	0.110821	0	3	-15.8498	-30.033	0.00768081	7.68081	-15.8498	-30.033	7.68081	no correction	no correction	no correction
16	2619	WaterStd	USGS46	USGS46	2020-11-24 12:30:12	IPL-17O-2619	Data_469 IPL-17O-2619 USGS 46-R16-6	0	-25.1347	0.00336868	-47.7181	0.00116952	-69.2482	0.135022	572.791	0.0896818	0	3	-16.0202	-30.3355	-0.00302435	-3.02435	-16.0202	-30.3355	-3.02435	no correction	no correction	no correction
16	2620	Water	cc-w	Silver Lake Sept 2020	2020-11-24 14:18:25	IPL-17O-2620	Data_470 IPL-17O-2620 Silver Lake Sept 2020-R16-1	2	-12.1851	0.00392787	-23.5638	0.0011892	-34.9484	0.157831	538.079	0.0927875	0	3	-1.8305	-3.43245	-0.0181616	-18.1616	-1.8305	-3.43245	-18.1616	no correction	no correction	no correction
16	2621	Water	cc-w	Silver Lake Sept 2020	2020-11-24 16:11:08	IPL-17O-2621	Data_471 IPL-17O-2621 Silver Lake Sept 2020-R16-2	0	-11.9369	0.00355569	-23.09	0.00110736	-33.9997	0.145256	663.72	0.0978747	0	3	-1.56103	-2.91306	-0.0229347	-22.9347	-1.56103	-2.91306	-22.9347	no correction	no correction	no correction
16	2622	WaterStd	SMOW	SMOW	2020-11-24 18:00:36	IPL-17O-2622	Data_472 IPL-17O-2622 VSMOW2-B5-R16-24	2	-10.5907	0.00364268	-20.5897	0.00134551	-30.5953	0.137652	610.865	0.144964	0	3	-0.098357	-0.171621	-0.00774124	-7.74124	-0.098357	-0.171621	-7.74124	no correction	no correction	no correction
16	2623	WaterStd	SMOW	SMOW	2020-11-24 19:53:40	IPL-17O-2623	Data_473 IPL-17O-2623 VSMOW2-B5-R16-25	0	-10.5286	0.00396508	-20.4886	0.00132456	-30.5722	0.142024	617.575	0.0843891	0	3	-0.0314639	-0.0620383	0.00129229	1.29229	-0.0314639	-0.0620383	1.29229	no correction	no correction	no correction
16	2624	WaterStd	SMOW	SMOW	2020-11-25 10:48:12	IPL-17O-2624	Data_474 IPL-17O-2624 VSMOW2-B5-R16-26	0	-10.3482	0.00355736	-20.1488	0.00129041	-30.5227	0.135802	493.651	0.190148	0	3	0.159751	0.300654	0.00100543	1.00543	0.159751	0.300654	1.00543	no correction	no correction	no correction
16	2625	WaterStd	SMOW	SMOW	2020-11-25 12:36:12	IPL-17O-2625	Data_475 IPL-17O-2625 VSMOW2-B5-R16-27	0	-10.5398	0.00347876	-20.5091	0.00128418	-30.8569	0.166326	551.605	0.182308	0	3	-0.0489561	-0.0950688	0.00124027	1.24027	-0.0489561	-0.0950688	1.24027	no correction	no correction	no correction
16	2626	WaterStd	SLAP	SLAP	2020-11-25 14:42:34	IPL-17O-2626	Data_476 IPL-17O-2626 SLAP2-B6-R16-21	2	-37.7881	0.00356165	-70.957	0.00116218	-106.451	0.216103	396.121	0.27971	0	3	-30.0913	-56.9381	-0.027988	-27.988	-30.0913	-56.9381	-27.988	no correction	no correction	no correction
16	2627	WaterStd	SLAP	SLAP	2020-11-25 16:33:54	IPL-17O-2627	Data_477 IPL-17O-2627 SLAP2-B6-R16-22	0	-37.5177	0.00343672	-70.4637	0.00129304	-101.621	0.138393	464.244	0.192353	0	3	-29.7892	-56.3676	-0.0271301	-27.1301	-29.7892	-56.3676	-27.1301	no correction	no correction	no correction
16	2628	WaterStd	SLAP	SLAP	2020-11-25 18:30:43	IPL-17O-2628	Data_478 IPL-17O-2628 SLAP2-B6-R16-23 1	0	-38.0285	0.00419786	-71.3995	0.00114776	-104.971	0.183834	393.759	0.195757	0	3	-30.3616	-57.4538	-0.0260332	-26.0332	-30.3616	-57.4538	-26.0332	no correction	no correction	no correction
16	2630	WaterStd	SLAP	SLAP	2020-11-30 11:41:27	IPL-17O-2630	Data_479 IPL-17O-2630 SLAP2-B6-R16-24	0	-37.5691	0.00384544	-70.5656	0.00217624	-101.185	0.171034	449.406	0.190319	0	3	-29.8833	-56.5586	-0.0203532	-20.3532	-29.8833	-56.5586	-20.3532	no correction	no correction	no correction
16	2637	Water	cc-w	IPL-19W-1087	2020-12-01 13:47:21	IPL-17O-2637	Data_486 IPL-17O-2637 IPL-19W-1087-R16-1	0	-14.0698	0.00333159	-27.149	0.00161612	-40.007	0.171444	555.688	0.0942652	0	3	-3.93618	-7.48608	0.0164641	16.4641	-3.93618	-7.48608	16.4641	no correction	no correction	no correction
16	2638	Water	cc-w	IPL-19W-1087	2020-12-01 15:35:49	IPL-17O-2638	Data_487 IPL-17O-2638 IPL-19W-1087-R16-2	0	-14.2369	0.00444293	-27.4485	0.00130008	-40.67	0.106158	533.218	0.100805	0	3	-4.11899	-7.81772	0.00876764	8.76764	-4.11899	-7.81772	8.76764	no correction	no correction	no correction
16	2639	Water	Julia's Waters	OceanAtScottCreek-12.24.19	2020-12-01 18:23:51	IPL-17O-2639	Data_488 IPL-17O-2639 OceanAtScottCreek-12.24.19-R16-1	2	-11.04	0.00380746	-21.4259	0.0012446	-31.564	0.133207	558.39	0.110047	0	3	-0.639718	-1.19431	-0.0091203	-9.1203	-0.639718	-1.19431	-9.1203	no correction	no correction	no correction
16	2640	Water	Julia's Waters	OceanAtScottCreek-12.24.19	2020-12-02 09:56:38	IPL-17O-2640	Data_489 IPL-17O-2640 OceanAtScottCreek-12.24.19-R16-2	0	-10.9177	0.00375594	-21.1987	0.00166376	-32.1569	0.138194	722.525	0.154747	0	3	-0.511786	-0.955008	-0.00754184	-7.54184	-0.511786	-0.955008	-7.54184	no correction	no correction	no correction
16	2641	Water	Julia's Waters	OceanAtSanSimeon-12.24.19	2020-12-02 13:18:47	IPL-17O-2641	Data_490 IPL-17O-2641 OceanAtSanSimeon-12.24.19-R16-1	0	-10.5756	0.00402278	-20.5421	0.00126282	-30.5253	0.138727	578.316	0.0830526	0	3	-0.141118	-0.237619	-0.0156546	-15.6547	-0.141118	-0.237619	-15.6547	no correction	no correction	no correction
16	2642	Water	Julia's Waters	OceanAtSanSimeon-12.24.19	2020-12-02 15:06:29	IPL-17O-2642	Data_491 IPL-17O-2642 OceanAtSanSimeon-12.24.19-R16-2	0	-10.3914	0.00356825	-20.2199	0.00162038	-30.1108	0.146115	646.562	0.149979	0	3	0.058348	0.114032	-0.00186076	-1.86076	0.058348	0.114032	-1.86076	no correction	no correction	no correction
16	2643	WaterStd	USGS46	USGS46	2020-12-02 16:53:30	IPL-17O-2643	Data_492 IPL-17O-2643 USGS 46-R16-7	2	-25.0059	0.00383482	-47.4969	0.00136229	-69.2725	0.130801	594.102	0.109494	0	3	-15.9401	-30.2099	0.0106943	10.6943	-15.9401	-30.2099	10.6943	no correction	no correction	no correction
16	2644	WaterStd	USGS46	USGS46	2020-12-02 18:42:56	IPL-17O-2644	Data_493 IPL-17O-2644 USGS 46-R16-8	0	-24.7681	0.0038001	-47.0461	0.00127778	-68.5253	0.155451	687.592	0.186864	0	3	-15.6784	-29.7024	0.00447323	4.47323	-15.6784	-29.7024	4.47323	no correction	no correction	no correction
16	2645	Water	cc-w	IPL-19W-1087	2020-12-03 10:49:27	IPL-17O-2645	Data_494 IPL-17O-2645 IPL-19W-1087-R16-3	2	-14.4181	0.00384737	-27.7985	0.00134702	-41.3237	0.148057	542.774	0.0900556	0	3	-4.33033	-8.23144	0.0158739	15.8739	-4.33033	-8.23144	15.8739	no correction	no correction	no correction
16	2649	Water	cc-w	SilverLakeSept2020	2020-12-03 18:08:06	IPL-17O-2649	Data_498 IPL-17O-2649 SilverLakeSept2020-R16-3 1	1	-11.8231	0.00386215	-22.88	0.00123928	-34.4883	0.154574	628.887	0.113522	0	3	-1.50616	-2.81996	-0.0172259	-17.2259	-1.50616	-2.81996	-17.2259	no correction	no correction	no correction
16	2651	Water	Julia's Waters	OceanAtSanSimeon-12.24.19	2020-12-04 11:40:53	IPL-17O-2651	Data_500 IPL-17O-2651 OceanAtSanSimeon-12.24.19-R16-3 1	0	-10.5153	0.00422057	-20.4462	0.00143061	-31.1448	0.13913	942.224	0.288868	0	3	-0.0903536	-0.161825	-0.00491025	-4.91025	-0.0903536	-0.161825	-4.91025	no correction	no correction	no correction
16	2652	WaterStd	SMOW	SMOW	2020-12-04 14:34:37	IPL-17O-2652	Data_501 IPL-17O-2652 VSMOW2-B5-R16-28	0	-10.4728	0.00314902	-20.3739	0.00145908	-31.4478	0.148796	691.736	0.165323	0	3	-0.0451172	-0.0844817	-0.000510927	-0.510927	-0.0451172	-0.0844817	-0.510927	no correction	no correction	no correction
16	2653	WaterStd	SMOW	SMOW	2020-12-04 16:41:39	IPL-17O-2653	Data_502 IPL-17O-2653 VSMOW2-B5-R16-29	0	-10.387	0.00391016	-20.2172	0.00135405	-31.2033	0.103479	747.13	0.142657	0	3	0.0474563	0.0857578	0.0021762	2.1762	0.0474563	0.0857578	2.1762	no correction	no correction	no correction
16	2655	WaterStd	SLAP	SLAP	2020-12-04 20:59:09	IPL-17O-2655	Data_504 IPL-17O-2655 SLAP2-B6-R16-26 1	0	-37.2724	0.00427166	-70.0283	0.00137016	-100.842	0.149456	528.115	0.116606	0	3	-29.5847	-56.0028	-0.0151633	-15.1633	-29.5847	-56.0028	-15.1633	no correction	no correction	no correction
17	2669	WaterStd	House DI	House DI	2021-01-29 17:52:57	IPL-17O-2669	Data_507 IPL-17O-2669 House DI#1-R17-3	2	-13.5437	0.00445795	-26.1754	0.00569539	-38.7677	0.191814	1229.21	0.653835	0	1	-3.533	-6.76153	0.0370828	37.0828	-3.533	-6.76153	37.0828	no correction	no correction	no correction
17	2670	WaterStd	House DI	House DI	2021-02-01 16:17:03	IPL-17O-2670	Data_508 IPL-17O-2670 House DI#1-R17-4	0	-13.9092	0.00357273	-26.849	0.00245167	-42.4046	0.183184	1309.88	0.626968	0	1	-3.91947	-7.48252	0.0312977	31.2977	-3.91947	-7.48252	31.2977	no correction	no correction	no correction
17	2671	WaterStd	House DI	House DI	2021-02-01 19:06:12	IPL-17O-2671	Data_509 IPL-17O-2671 House DI#1-R17-5	0	-13.5835	0.00395745	-26.2361	0.00116612	-40.1163	0.134065	1040.32	0.29089	0	1	-3.57258	-6.82168	0.0292677	29.2677	-3.57258	-6.82168	29.2677	no correction	no correction	no correction
17	2672	WaterStd	House DI	House DI	2021-02-02 08:53:21	IPL-17O-2672	Data_510 IPL-17O-2672 House DI#1-R17-6	0	-13.5402	0.00455966	-26.1442	0.0023183	-41.0366	0.147203	1350.87	0.480187	0	1	-3.52599	-6.72166	0.0230485	23.0484	-3.52599	-6.72166	23.0484	no correction	no correction	no correction
17	2673	WaterStd	House DI	House DI	2021-02-02 13:32:43	IPL-17O-2673	Data_515 IPL-17O-2673 House DI#1-R17-7	0	-13.6569	0.00456529	-26.3685	0.00186465	-37.2636	0.161733	1092.07	0.858637	0	1	-3.65003	-6.96303	0.0264504	26.4504	-3.65003	-6.96303	26.4504	no correction	no correction	no correction
17	2674	WaterStd	House DI	House DI	2021-02-02 16:05:30	IPL-17O-2674	Data_516 IPL-17O-2674 House DI#1-R17-8	0	-13.677	0.00390988	-26.3977	0.00105761	-38.7432	0.133181	907.877	0.582792	0	1	-3.67128	-6.99432	0.0217213	21.7213	-3.67128	-6.99432	21.7213	no correction	no correction	no correction
17	2675	WaterStd	House DI	House DI	2021-02-02 18:27:41	IPL-17O-2675	Data_517 IPL-17O-2675 House DI#1-R17-9	0	-13.6237	0.00414584	-26.2887	0.00145589	-38.8748	0.143749	1002.44	0.34896	0	1	-3.61449	-6.87661	0.0163546	16.3546	-3.61449	-6.87661	16.3546	no correction	no correction	no correction
17	2676	WaterStd	SMOW	SMOW	2021-02-04 09:18:56	IPL-17O-2676	Data_518 IPL-17O-2676 VSMOW2-B5-R17-1	2	-10.209	0.00429851	-19.8566	0.00189503	-30.7402	0.179137	972.681	0.537556	0	1	0.0155998	0.0333095	-0.00198767	-1.98768	0.0155998	0.0333095	-1.98768	no correction	no correction	no correction
17	2677	WaterStd	SMOW	SMOW	2021-02-04 11:12:09	IPL-17O-2677	Data_519 IPL-17O-2677 VSMOW2-B5-R17-2	0	-10.2185	0.00422508	-19.895	0.000945908	-31.4877	0.150136	991.398	0.376182	0	1	0.00560875	-0.00755904	0.00959992	9.59992	0.00560875	-0.00755904	9.59992	no correction	no correction	no correction
17	2678	WaterStd	SMOW	SMOW	2021-02-04 13:08:01	IPL-17O-2678	Data_520 IPL-17O-2678 VSMOW2-B5-R17-3	0	-10.201	0.00386793	-19.8448	0.00130112	-31.0438	0.177162	1006.51	0.37502	0	1	0.0243006	0.0462185	-0.000102815	-0.102815	0.0243006	0.0462185	-0.102815	no correction	no correction	no correction
17	2679	WaterStd	SMOW	SMOW	2021-02-04 15:52:45	IPL-17O-2679	Data_521 IPL-17O-2679 VSMOW2-B5-R17-4	0	-10.2559	0.00409362	-19.949	0.00135486	-31.5061	0.141425	899.232	0.160553	0	1	-0.0338072	-0.065069	0.000549185	0.549185	-0.0338072	-0.065069	0.549185	no correction	no correction	no correction
17	2681	WaterStd	SLAP	SLAP	2021-02-05 14:30:33	IPL-17O-2681	Data_523 IPL-17O-2681 SLAP2-B6-R17-2	0	-37.5011	0.00699037	-70.413	0.00834852	-101.867	0.193326	2104.86	0.676579	0	1	-29.36	-55.5868	-0.010169	-10.169	-29.36	-55.5868	-10.169	no correction	no correction	no correction
17	2682	WaterStd	SLAP	SLAP	2021-02-05 16:51:43	IPL-17O-2682	Data_524 IPL-17O-2682 SLAP2-B6-R17-3	0	-38.1384	0.00342496	-71.5618	0.0012884	-103.733	0.156185	1055.01	0.254688	0	1	-30.0563	-56.8871	-0.0198574	-19.8574	-30.0563	-56.8871	-19.8574	no correction	no correction	no correction
17	2685	WaterStd	SLAP	SLAP	2021-02-08 16:31:33	IPL-17O-2685	Data_525 IPL-17O-2685 SLAP2-B6-R17-6	0	-38.1562	0.00531792	-71.5978	0.00926828	-107.237	0.168473	1172.68	0.56181	0	1	-30.0731	-56.9227	-0.0178728	-17.8728	-30.0731	-56.9227	-17.8728	no correction	no correction	no correction
17	2686	WaterStd	SLAP	SLAP	2021-02-08 18:42:02	IPL-17O-2686	Data_526 IPL-17O-2686 SLAP2-B6-R17-7	0	-38.1002	0.00393503	-71.5045	0.00178051	-105.049	0.162269	1117.58	0.39297	0	1	-30.0117	-56.8169	-0.0123884	-12.3884	-30.0117	-56.8169	-12.3884	no correction	no correction	no correction
17	2696	CarbonateStd	102-GC-AZ01	102-GC-AZ01	2021-02-18 16:59:06	IPL-17O-2696	Data_530 IPL-17O-2696 102-GC-AZ01-R17-10	0	0.741357	0.00355482	1.00272	0.00130652	-7.23779	0.167348	1633.78	0.736801	0	1	11.5772	22.1354	-0.110297	-110.297	7.79328	14.9036	-75.8257	secondary correction applied	secondary correction applied	mineral + 1-pt normalization applied to D17O for data.cor[[2]] using IAEA-603 and/or IAEA-C1 as calcite. Offset=-11.19 per meg
17	2697	CarbonateStd	102-GC-AZ01	102-GC-AZ01	2021-02-18 21:18:28	IPL-17O-2697	Data_531 IPL-17O-2697 102-GC-AZ01-R17-11	0	1.08019	0.00361349	1.63549	0.00139357	-5.74464	0.154698	631.369	0.47181	0	1	11.9326	22.7979	-0.104699	-104.699	8.16789	15.6025	-70.2275	secondary correction applied	secondary correction applied	mineral + 1-pt normalization applied to D17O for data.cor[[2]] using IAEA-603 and/or IAEA-C1 as calcite. Offset=-11.19 per meg
17	2699	CarbonateStd	IAEA-603	IAEA-603	2021-02-21 14:38:21	IPL-17O-2699	Data_533 IPL-17O-2699 IAEA-603-R17-1	0	6.68079	0.00298361	12.3483	0.0020996	15.4005	0.180456	888.909	0.915705	0	1	17.7883	33.947	-0.135659	-135.659	14.3471	27.3642	-101.188	secondary correction applied	secondary correction applied	mineral + 1-pt normalization applied to D17O for data.cor[[2]] using IAEA-603 and/or IAEA-C1 as calcite. Offset=-11.19 per meg
17	2700	CarbonateStd	IAEA-603	IAEA-603	2021-02-22 12:52:34	IPL-17O-2700	Data_534 IPL-17O-2700 IAEA-603-R17-2	0	6.71941	0.00403955	12.4348	0.00179522	15.6065	0.137583	959.33	0.534956	0	1	17.8294	34.038	-0.142625	-142.625	14.3909	27.4602	-108.154	secondary correction applied	secondary correction applied	mineral + 1-pt normalization applied to D17O for data.cor[[2]] using IAEA-603 and/or IAEA-C1 as calcite. Offset=-11.19 per meg
17	2704	CarbonateStd	IAEA-C1	IAEA-C1	2021-02-25 14:20:18	IPL-17O-2704	Data_538 IPL-17O-2704 IAEA-C1-R17-2	0	6.41859	0.00404513	11.8547	0.00148343	15.3025	0.164004	878.601	0.238291	0	1	17.5188	33.4431	-0.139206	-139.206	14.0629	26.8326	-104.735	secondary correction applied	secondary correction applied	mineral + 1-pt normalization applied to D17O for data.cor[[2]] using IAEA-603 and/or IAEA-C1 as calcite. Offset=-11.19 per meg
17	2705	Carbonate	cc-w	ScottCreek-Shell	2021-02-25 17:36:04	IPL-17O-2705	Data_539 IPL-17O-2705 ScottCreek-Shell-R17-1	0	8.33537	0.00327365	15.5003	0.00104178	20.991	0.158985	1139.54	0.11001	0	1	19.5148	37.2095	-0.131789	-131.789	16.1683	30.806	-97.3178	secondary correction applied	secondary correction applied	mineral + 1-pt normalization applied to D17O for data.cor[[2]] using IAEA-603 and/or IAEA-C1 as calcite. Offset=-11.19 per meg
17	2706	Carbonate	cc-w	ScottCreek-Shell	2021-02-26 13:04:48	IPL-17O-2706	Data_540 IPL-17O-2706 ScottCreek-Shell-R17-2	0	8.16527	0.00421617	15.1841	0.0013596	19.794	0.173402	845.513	0.508891	0	1	19.3386	36.8848	-0.136569	-136.569	15.9826	30.4635	-102.098	secondary correction applied	secondary correction applied	mineral + 1-pt normalization applied to D17O for data.cor[[2]] using IAEA-603 and/or IAEA-C1 as calcite. Offset=-11.19 per meg
17	2707	Carbonate	cc-w	SanSimeon-Shell	2021-02-26 16:21:21	IPL-17O-2707	Data_541 IPL-17O-2707 SanSimeon-Shell-R17-1	0	8.6082	0.00392237	16.0197	0.00131848	21.1799	0.155418	1018.47	0.0894873	0	1	19.7995	37.7466	-0.130757	-130.757	16.4685	31.3727	-96.2859	secondary correction applied	secondary correction applied	mineral + 1-pt normalization applied to D17O for data.cor[[2]] using IAEA-603 and/or IAEA-C1 as calcite. Offset=-11.19 per meg
17	2708	Carbonate	cc-w	SanSimeon-Shell	2021-02-26 19:07:38	IPL-17O-2708	Data_542 IPL-17O-2708 SanSimeon-Shell-R17-2	0	8.70573	0.00405437	16.18	0.00128156	21.5	0.146234	994.013	0.33703	0	1	19.901	37.912	-0.116546	-116.546	16.5748	31.5471	-82.0754	secondary correction applied	secondary correction applied	mineral + 1-pt normalization applied to D17O for data.cor[[2]] using IAEA-603 and/or IAEA-C1 as calcite. Offset=-11.19 per meg
17	2709	CarbonateStd	IAEA-603	IAEA-603	2021-02-27 17:06:56	IPL-17O-2709	Data_543 IPL-17O-2709 IAEA-603-R17-3	0	6.69043	0.00399687	12.3718	0.00109578	15.2508	0.13014	1087.94	0.120021	0	1	17.804	33.9817	-0.138359	-138.359	14.3638	27.4009	-103.888	secondary correction applied	secondary correction applied	mineral + 1-pt normalization applied to D17O for data.cor[[2]] using IAEA-603 and/or IAEA-C1 as calcite. Offset=-11.19 per meg
17	2716	Carbonate	Julia's samples	Silver Lake Clam	2021-03-02 12:25:03	IPL-17O-2716	Data_552 IPL-17O-2716 Silver Lake Clam-R17-1	0	6.61482	0.00437152	12.2179	0.00175301	13.632	0.153323	762.153	0.542005	0	1	17.7278	33.8274	-0.133083	-133.083	14.2831	27.2381	-98.6116	secondary correction applied	secondary correction applied	mineral + 1-pt normalization applied to D17O for data.cor[[2]] using IAEA-603 and/or IAEA-C1 as calcite. Offset=-11.19 per meg
17	2717	Carbonate	Julia's samples	SilverLake Clam	2021-03-03 14:46:00	IPL-17O-2717	Data_556 IPL-17O-2717 SilverLake Clam-R17-2	0	6.36691	0.0039181	11.7882	0.00159574	16.7802	0.149937	751.806	0.148005	0	1	17.4704	33.3846	-0.15665	-156.65	14.0129	26.7709	-122.179	secondary correction applied	secondary correction applied	mineral + 1-pt normalization applied to D17O for data.cor[[2]] using IAEA-603 and/or IAEA-C1 as calcite. Offset=-11.19 per meg
17	2718	Carbonate	Julia's samples	San Simeon-Shell	2021-03-03 17:42:00	IPL-17O-2718	Data_558 IPL-17O-2718 San Simeon-Shell-R17-3	0	8.39837	0.00393849	15.6308	0.00134891	22.7006	0.12899	638.932	0.125079	0	1	19.5859	37.3545	-0.137284	-137.284	16.2435	30.959	-102.813	secondary correction applied	secondary correction applied	mineral + 1-pt normalization applied to D17O for data.cor[[2]] using IAEA-603 and/or IAEA-C1 as calcite. Offset=-11.19 per meg
17	2721	CarbonateStd	102-GC-AZ01	102-GC-AZ01	2021-03-04 11:46:42	IPL-17O-2721	Data_562 IPL-17O-2721 102-GC-AZ01-R17-13	0	0.898545	0.00442057	1.27936	0.00114037	1.42626	0.152952	791.428	0.434373	0	1	11.7547	22.4488	-0.0982533	-98.2533	7.97985	15.2342	-63.7822	secondary correction applied	secondary correction applied	mineral + 1-pt normalization applied to D17O for data.cor[[2]] using IAEA-603 and/or IAEA-C1 as calcite. Offset=-11.19 per meg
17	2722	CarbonateStd	102-GC-AZ01	102-GC-AZ01	2021-03-04 14:33:22	IPL-17O-2722	Data_563 IPL-17O-2722 102-GC-AZ01-R17-14	0	1.03948	0.00412927	1.56049	0.00114329	1.52311	0.112008	729.764	0.20174	0	1	11.9025	22.7431	-0.105825	-105.825	8.13625	15.5447	-71.3535	secondary correction applied	secondary correction applied	mineral + 1-pt normalization applied to D17O for data.cor[[2]] using IAEA-603 and/or IAEA-C1 as calcite. Offset=-11.19 per meg
17	2731	CarbonateStd	IAEA-C1	IAEA-C1	2021-03-06 19:09:53	IPL-17O-2731	Data_573 IPL-17O-2731 IAEA-C1-R17-4	0	7.35288	0.0053674	13.6402	0.00159946	18.3229	0.131998	681.691	0.317538	0	1	18.5006	35.3053	-0.140644	-140.644	15.0988	28.7972	-106.173	secondary correction applied	secondary correction applied	mineral + 1-pt normalization applied to D17O for data.cor[[2]] using IAEA-603 and/or IAEA-C1 as calcite. Offset=-11.19 per meg
17	2732	CarbonateStd	IAEA-C1	IAEA-C1	2021-03-06 21:54:52	IPL-17O-2732	Data_574 IPL-17O-2732 IAEA-C1-R17-5	0	7.42644	0.00383012	13.7644	0.00158675	19.7913	0.143023	725.834	0.351358	0	1	18.5773	35.4338	-0.131761	-131.761	15.1792	28.9327	-97.2902	secondary correction applied	secondary correction applied	mineral + 1-pt normalization applied to D17O for data.cor[[2]] using IAEA-603 and/or IAEA-C1 as calcite. Offset=-11.19 per meg
17	2736	Carbonate	Julia's Samples	Scott Creek-Shell	2021-03-08 15:04:21	IPL-10O-2736	Data_578 IPL-10O-2736 Scott Creek-Shell-R17-4	0	8.54636	0.00388514	15.9317	0.00145034	20.6977	0.117046	626.191	0.191392	0	1	19.7443	37.673	-0.147079	-147.079	16.4112	31.295	-112.608	secondary correction applied	secondary correction applied	mineral + 1-pt normalization applied to D17O for data.cor[[2]] using IAEA-603 and/or IAEA-C1 as calcite. Offset=-11.19 per meg
17	2737	Carbonate	Julia's Samples	Silver Lake Clam	2021-03-08 18:04:56	IPL-17O-2737	Data_579 IPL-17O-2737 Silver Lake Clam-R17-3	0	6.84585	0.00303917	12.6841	0.00134633	15.8587	0.146547	725.724	0.284487	0	1	17.9743	34.3204	-0.146899	-146.899	14.5439	27.7581	-112.428	secondary correction applied	secondary correction applied	mineral + 1-pt normalization applied to D17O for data.cor[[2]] using IAEA-603 and/or IAEA-C1 as calcite. Offset=-11.19 per meg
17	2751	CarbonateStd	102-GC-AZ01	102-GC-AZ01	2021-03-11 21:26:21	IPL-17O-2751	Data_593 IPL-17O-2751 102-GC-AZ01-R17-15	0	1.2705	0.00398686	1.99794	0.00156477	1.42977	0.151612	692.364	0.137334	0	1	12.1514	23.2132	-0.105228	-105.228	8.3987	16.0406	-70.7566	secondary correction applied	secondary correction applied	mineral + 1-pt normalization applied to D17O for data.cor[[2]] using IAEA-603 and/or IAEA-C1 as calcite. Offset=-11.19 per meg
17	2752	CarbonateStd	102-GC-AZ01	102-GC-AZ01	2021-03-12 00:30:47	IPL-17O-2752	Data_594 IPL-17O-2752 102-GC-AZ01-R17-16	0	1.34635	0.00372808	2.13691	0.00158928	1.55641	0.119604	503.789	0.0783914	0	1	12.231	23.3588	-0.102462	-102.462	8.48254	16.1942	-67.9912	secondary correction applied	secondary correction applied	mineral + 1-pt normalization applied to D17O for data.cor[[2]] using IAEA-603 and/or IAEA-C1 as calcite. Offset=-11.19 per meg
17	2753	WaterStd	SMOW	SMOW	2021-03-12 11:26:15	IPL-17O-2753	Data_595 IPL-17O-2753 VSMOW2-B5-R17-5	2	-10.2169	0.00533843	-19.8734	0.00229793	-30.6983	0.168323	700.097	0.185116	0	1	0.0405165	0.0777404	-0.000530478	-0.530478	0.0405165	0.0777404	-0.530478	no correction	no correction	no correction
17	2754	WaterStd	SMOW	SMOW	2021-03-12 13:14:24	IPL-17O-2754	Data_596 IPL-17O-2754 VSMOW2-B5-R17-6	0	-10.2334	0.0044135	-19.8877	0.00154447	-30.6345	0.15814	949.823	0.147467	0	1	0.0229988	0.0625725	-0.0100395	-10.0395	0.0229988	0.0625725	-10.0395	no correction	no correction	no correction
17	2755	WaterStd	SMOW	SMOW	2021-03-12 15:48:24	IPL-17O-2755	Data_597 IPL-17O-2755 VSMOW2-B5-R17-7	0	-10.2759	0.00418339	-19.9825	0.00126231	-31.5827	0.148992	967.574	0.168805	0	1	-0.0219406	-0.0387812	-0.0014641	-1.4641	-0.0219406	-0.0387812	-1.4641	no correction	no correction	no correction
17	2756	WaterStd	SMOW	SMOW	2021-03-12 17:42:28	IPL-17O-2756	Data_598 IPL-17O-2756 VSMOW2-B5-R17-8	0	-10.3429	0.00391784	-20.1195	0.00158761	-31.1446	0.155533	821.076	0.132788	0	1	-0.0929394	-0.185196	0.00484408	4.84408	-0.0929394	-0.185196	4.84408	no correction	no correction	no correction
17	2758	WaterStd	SLAP	SLAP	2021-03-12 20:49:17	IPL-17O-2758	Data_600 IPL-17O-2758 SLAP2-B6-R17-9	3	-38.5596	0.00382999	-72.3369	0.00303027	-105.972	0.154989	713.36	0.131886	0	1	-30.4844	-57.7047	-0.0163763	-16.3763	-30.4844	-57.7047	-16.3763	no correction	no correction	no correction
17	2759	WaterStd	SLAP	SLAP	2021-03-13 10:44:12	IPL-17O-2759	Data_601 IPL-17O-2759 SLAP2-B6-R17-10	0	-38.8183	0.00456257	-72.8134	0.00682353	-107.303	0.177859	546.752	0.227015	0	1	-30.7668	-58.2441	-0.0139453	-13.9453	-30.7668	-58.2441	-13.9453	no correction	no correction	no correction
17	2760	WaterStd	SLAP	SLAP	2021-03-13 14:10:07	IPL-17O-2760	Data_602 IPL-17O-2760 SLAP2-B6-R17-11	0	-38.755	0.00442683	-72.7144	0.00449376	-106.835	0.158156	609.123	0.0963074	0	1	-30.6975	-58.1316	-0.00403373	-4.03373	-30.6975	-58.1316	-4.03373	no correction	no correction	no correction
17	2761	WaterStd	SLAP	SLAP	2021-03-13 16:29:09	IPL-17O-2761	Data_603 IPL-17O-2761 SLAP2-B6-R17-12	0	-38.6589	0.00382547	-72.522	0.00214411	-106.712	0.115887	719.459	0.111663	0	1	-30.5923	-57.9132	-0.0140757	-14.0757	-30.5923	-57.9132	-14.0757	no correction	no correction	no correction
17	2792	CarbonateStd	102-GC-AZ01	102-GC-AZ01	2021-03-21 21:47:06	IPL-17O-2792	Data_631 IPL-17O-2792 102-GC-AZ01-R17-18	0	0.763881	0.00364997	1.04828	0.00113007	-1.52109	0.144427	585.914	0.0713925	0	1	11.6295	22.237	-0.111602	-111.602	7.84853	15.0107	-77.1307	secondary correction applied	secondary correction applied	mineral + 1-pt normalization applied to D17O for data.cor[[2]] using IAEA-603 and/or IAEA-C1 as calcite. Offset=-11.19 per meg
17	2807	CarbonateStd	IAEA-C1	IAEA-C1	2021-03-24 23:51:02	IPL-17O-2807	Data_646 IPL-17O-2807 IAEA-C1-R17-6	0	6.91265	0.00423151	12.7904	0.00151366	17.6342	0.146758	436.919	0.080503	0	1	18.0588	34.4583	-0.13521	-135.21	14.6324	27.9036	-100.739	secondary correction applied	secondary correction applied	mineral + 1-pt normalization applied to D17O for data.cor[[2]] using IAEA-603 and/or IAEA-C1 as calcite. Offset=-11.19 per meg
17	2817	CarbonateStd	IAEA-C1	IAEA-C1	2021-03-26 23:14:54	IPL-17O-2817	Data_656 IPL-17O-2817 IAEA-C1-R17-8	0	7.38364	0.00428081	13.6772	0.00123093	17.8155	0.170537	611.15	0.109933	0	1	18.5511	35.3783	-0.128602	-128.602	15.1515	28.8742	-94.1305	secondary correction applied	secondary correction applied	mineral + 1-pt normalization applied to D17O for data.cor[[2]] using IAEA-603 and/or IAEA-C1 as calcite. Offset=-11.19 per meg
17	2819	CarbonateStd	IAEA-C1	IAEA-C1	2021-03-29 14:50:51	IPL-17O-2819	Data_658 IPL-17O-2819 IAEA-C1-R17-10	0	7.35442	0.00424334	13.6345	0.00225303	15.8278	0.148168	592.37	0.172498	0	1	18.5232	35.3387	-0.135695	-135.695	15.1223	28.8325	-101.224	secondary correction applied	secondary correction applied	mineral + 1-pt normalization applied to D17O for data.cor[[2]] using IAEA-603 and/or IAEA-C1 as calcite. Offset=-11.19 per meg
17	2836	CarbonateStd	102-GC-AZ01	102-GC-AZ01	2021-04-02 12:29:13	IPL-17O-2836	Data_675 IPL-17O-2836 102-GC-AZ01-R17-19	0	1.69906	0.00358552	2.82331	0.0013807	2.50275	0.147604	679.979	0.184954	0	1	12.6203	24.1133	-0.11154	-111.54	8.89372	16.9901	-77.0688	secondary correction applied	secondary correction applied	mineral + 1-pt normalization applied to D17O for data.cor[[2]] using IAEA-603 and/or IAEA-C1 as calcite. Offset=-11.19 per meg
17	2837	CarbonateStd	102-GC-AZ01	102-GC-AZ01	2021-04-02 15:04:42	IPL-17O-2837	Data_676 IPL-17O-2837 102-GC-AZ01-R17-20	0	1.35603	0.00428309	2.16526	0.00120517	2.27897	0.163805	535.634	0.0977113	0	1	12.261	23.4257	-0.107792	-107.792	8.51448	16.2648	-73.3208	secondary correction applied	secondary correction applied	mineral + 1-pt normalization applied to D17O for data.cor[[2]] using IAEA-603 and/or IAEA-C1 as calcite. Offset=-11.19 per meg
17	2838	WaterStd	SMOW	SMOW	2021-04-02 16:55:41	IPL-17O-2838	Data_677 IPL-17O-2838 VSMOW2-B5-R17-9	2	-10.05	0.00394333	-19.5643	0.00130396	-30.0167	0.13597	691.685	0.115155	0	1	0.237067	0.445136	0.00203445	2.03445	0.237067	0.445136	2.03445	no correction	no correction	no correction
17	2839	WaterStd	SMOW	SMOW	2021-04-04 18:03:40	IPL-17O-2839	Data_678 IPL-17O-2839 VSMOW2-B5-R17-10	0	-10.4384	0.00352041	-20.2664	0.0015432	-31.3995	0.162731	686.87	0.145912	0	1	-0.173142	-0.302799	-0.0132639	-13.2639	-0.173142	-0.302799	-13.2639	no correction	no correction	no correction
17	2840	WaterStd	SMOW	SMOW	2021-04-04 19:53:05	IPL-17O-2840	Data_679 IPL-17O-2840 VSMOW2-B5-R17-11	0	-10.2988	0.00384037	-20.0288	0.00134128	-31.4072	0.144851	738.511	0.103395	0	1	-0.0249353	-0.0482689	0.000550691	0.550691	-0.0249353	-0.0482689	0.550691	no correction	no correction	no correction
17	2841	WaterStd	SLAP	SLAP	2021-04-05 13:20:55	IPL-17O-2841	Data_680 IPL-17O-2841 SLAP2-B6-R17-13	2	-38.0371	0.00428062	-71.3787	0.00271239	-109.552	0.18425	813.727	0.249518	0	1	-29.8914	-56.5778	-0.0183068	-18.3069	-29.8914	-56.5778	-18.3069	no correction	no correction	no correction
17	2843	WaterStd	SLAP	SLAP	2021-04-05 18:38:09	IPL-17O-2843	Data_683 IPL-17O-2843 SLAP2-B6-R17-15	0	-38.2256	0.00461406	-71.7313	0.00183827	-104.307	0.14227	617.038	0.114063	0	1	-30.0973	-56.9768	-0.0135042	-13.5042	-30.0973	-56.9768	-13.5042	no correction	no correction	no correction
17	2861	CarbonateStd	IAEA-C1	IAEA-C1	2021-04-08 13:33:54	IPL-17O-2861	Data_700 IPL-17O-2861 IAEA-C1-R17-13	0	6.39908	0.00401005	11.8128	0.0015643	15.5944	0.138713	596.968	0.131624	0	1	17.537	33.4721	-0.136297	-136.297	14.082	26.8633	-101.826	secondary correction applied	secondary correction applied	mineral + 1-pt normalization applied to D17O for data.cor[[2]] using IAEA-603 and/or IAEA-C1 as calcite. Offset=-11.19 per meg
17	2878	CarbonateStd	IAEA-C1	IAEA-C1	2021-04-12 20:44:05	IPL-17O-2878	Data_717 IPL-17O-2878 IAEA-C1-R17-15	0	7.04176	0.0046421	13.027	0.00136882	18.1259	0.140331	552.676	0.215014	0	1	18.2106	34.7355	-0.129746	-129.746	14.7923	28.1961	-95.2752	secondary correction applied	secondary correction applied	mineral + 1-pt normalization applied to D17O for data.cor[[2]] using IAEA-603 and/or IAEA-C1 as calcite. Offset=-11.19 per meg
17	2879	CarbonateStd	IAEA-C1	IAEA-C1	2021-04-12 23:22:18	IPL-17O-2879	Data_718 IPL-17O-2879 IAEA-C1-R17-16	0	7.26854	0.00437523	13.4541	0.00165918	18.8553	0.131516	424.562	0.106762	0	1	18.4469	35.1771	-0.126578	-126.578	15.0414	28.6619	-92.1067	secondary correction applied	secondary correction applied	mineral + 1-pt normalization applied to D17O for data.cor[[2]] using IAEA-603 and/or IAEA-C1 as calcite. Offset=-11.19 per meg
17	2899	CarbonateStd	102-GC-AZ01	102-GC-AZ01	2021-04-19 09:29:21	IPL-17O-2899	Data_737 IPL-17O-2899 102-GC-AZ01-R17-24	0	1.61208	0.00449236	2.64831	0.00145863	3.19114	0.146216	569.487	0.122545	0	1	12.5447	23.9595	-0.105965	-105.965	8.81367	16.828	-71.4934	secondary correction applied	secondary correction applied	mineral + 1-pt normalization applied to D17O for data.cor[[2]] using IAEA-603 and/or IAEA-C1 as calcite. Offset=-11.19 per meg
17	2901	CarbonateStd	102-GC-AZ01	102-GC-AZ01	2021-04-19 15:21:47	IPL-17O-2901	Data_739 IPL-17O-2901 102-GC-AZ01-R17-26	0	0.938768	0.00438486	1.34331	0.00135029	1.21599	0.194484	538.695	0.0968847	0	1	11.8393	22.5953	-0.0910445	-91.0445	8.0687	15.3888	-56.5734	secondary correction applied	secondary correction applied	mineral + 1-pt normalization applied to D17O for data.cor[[2]] using IAEA-603 and/or IAEA-C1 as calcite. Offset=-11.19 per meg
17	2915	CarbonateStd	IAEA-C1	IAEA-C1	2021-04-22 12:03:38	IPL-17O-2915	Data_753 IPL-17O-2915 IAEA-C1-R17-18	0	7.20585	0.0043866	13.3367	0.00177003	19.3012	0.135316	621.234	0.158441	0	1	18.3904	35.0722	-0.127744	-127.744	14.9818	28.5513	-93.2725	secondary correction applied	secondary correction applied	mineral + 1-pt normalization applied to D17O for data.cor[[2]] using IAEA-603 and/or IAEA-C1 as calcite. Offset=-11.19 per meg
17	2935	CarbonateStd	102-GC-AZ01	102-GC-AZ01	2021-04-28 18:57:41	IPL-17O-2935	Data_775 IPL-17O-2935 102-GC-AZ01-R17-28	0	0.990582	0.0037842	1.4419	0.00116314	-0.755676	0.140977	513.658	0.0856892	0	1	11.902	22.7143	-0.0911203	-91.1203	8.13488	15.5143	-56.6491	secondary correction applied	secondary correction applied	mineral + 1-pt normalization applied to D17O for data.cor[[2]] using IAEA-603 and/or IAEA-C1 as calcite. Offset=-11.19 per meg
17	2961	WaterStd	SMOW	SMOW	2021-05-06 12:28:46	IPL-17O-2961	Data_802 IPL-17O-2961 VSMOW-B5-R17-13	0	-10.2678	0.00477252	-19.9809	0.00137403	-32.1675	0.119965	695.785	0.0840071	0	1	0.0371078	0.0577083	0.00663782	6.63782	0.0371078	0.0577083	6.63782	no correction	no correction	no correction
17	2962	WaterStd	SMOW	SMOW	2021-05-06 14:19:56	IPL-17O-2962	Data_803 IPL-17O-2962 VSMOW-B5-R17-14	0	-10.3471	0.00417566	-20.1132	0.00123549	-32.3816	0.167746	667.815	0.100202	0	1	-0.0469917	-0.0836879	-0.00280444	-2.80444	-0.0469917	-0.0836879	-2.80444	no correction	no correction	no correction
17	2963	WaterStd	SMOW	SMOW	2021-05-06 16:48:08	IPL-17O-2963	Data_804 IPL-17O-2963 VSMOW-B5-R17-15	0	-10.293	0.00363906	-20.0272	0.00185897	-32.193	0.15206	563.909	0.116293	0	1	0.0105057	0.00849784	0.0060188	6.0188	0.0105057	0.00849784	6.0188	no correction	no correction	no correction
17	2965	WaterStd	SLAP	SLAP	2021-05-07 10:10:00	IPL-17O-2965	Data_806 IPL-17O-2965 SLAP2-B6-R17-17	0	-38.1034	0.00555108	-71.5111	0.00691921	-107.44	0.179185	461.623	0.277554	0	1	-29.9344	-56.6725	-0.0113497	-11.3497	-29.9344	-56.6725	-11.3497	no correction	no correction	no correction
17	2966	WaterStd	SLAP	SLAP	2021-05-07 12:12:22	IPL-17O-2966	Data_807 IPL-17O-2966 SLAP2-B6-R17-18	0	-38.3686	0.00517044	-72.0333	0.00255298	-106.363	0.124039	432.258	0.135797	0	1	-30.2243	-57.2642	0.0111936	11.1936	-30.2243	-57.2642	11.1936	no correction	no correction	no correction
17	2967	WaterStd	SLAP	SLAP	2021-05-07 15:29:56	IPL-17O-2967	Data_808 IPL-17O-2967 SLAP2-B6-R17-19	0	-38.0593	0.00454647	-71.447	0.00439857	-105.114	0.138999	599.731	0.098566	0	1	-29.8861	-56.5996	-0.00149105	-1.49105	-29.8861	-56.5996	-1.49105	no correction	no correction	no correction

## Sheet: header description
Sheet 1 contains data from the University of Michigan IsoPaleoLab CoF3 reactors 13,14,15,16 and 17
Header	Explanation
reactor.ID	ID of the COF3 reactor
IPL.num	Unique number for analysis
User	Analyst
Type.1	Water, Carbonate, Water Standard, or Carbonate Standard
Type.2	Add'l sample information, i.e., which standard, whose samples
sample.ID	sample name
rep.num	Counter for replicates of that sample ID for the given reactor
Date.Time	Date and Time
Data.File	Data file name as assigned in mass spetrometer software
IPL.ID	Unique number for analysis, repeated
Name.full	Name that combines Data.File, IPL.ID and sample.ID
primes	number of primes (injection of H2O with identical d18O value as the sample/standard prior to the sample/standard into the COf3 reactor, to reduce memory effects)
d33	raw values
d33.err	raw values
d34	raw values
d34.err	raw values
d35	raw values
d35.err	raw values
d36	raw values
d36.err	raw values
flag	flag for analytical issues including memory effects due to large jump in d18O (1 = bad, 0 = good)
reactor.segment	Reactor is segmented based on major shift in reference frame, machine down time, etc. Each segment has its own normalization scheme.
dp17O.SMOWSLAP	vs. SMOW-SLAP
dp18O.SMOWSLAP	vs. SMOW-SLAP
D17O.SMOWSLAP	vs. SMOW-SLAP in permille
D17O.SMOWSLAP.per.meg	vs. SMOW-SLAP in permeg
dp17O.SMOWSLAP.CO2norm	mineral values (via IAEA-603 and values from Wostbrock et al., 2020) (carbonates only)
dp18O.SMOWSLAP.CO2norm	mineral values (via IAEA-603 and values from Wostbrock et al., 2020) (carbonates only)
D17O.SMOWSLAP.per.meg.carbNorm	mineral values (via IAEA-603 and values from Wostbrock et al., 2020) (carbonates only) (with reactor segment-specific drift applied)
dp17O.SMOWSLAP.CO2norm.type	Identifies whether no correction (e.g., waters) or a secondary correction (carbonates) was applied. The secondary or"blank" correction for carbonates is based on known values from traditional mass spectrometry measurements d18O(CO2) value to account for shifts in the acid bath and reduction lines. For d17O, this assumes that there is no change in the D'17O value. However, if D'17O itself is adjus…
dp18O.SMOWSLAP.CO2norm.type	Identifies whether no correction (e.g., waters) or a secondary correction (carbonates) was applied. The secondary or"blank" correction for carbonates is based on known values from traditional mass spectrometry measurements d18O(CO2) value to account for shifts in the acid bath and reduction lines. For d17O, this assumes that there is no change in the D'17O value. However, if D'17O itself is adjus…
D17O.SMOWSLAP.per.meg.carbNorm.type	Temporal drift correction for carbonates. The mineral values of IAEA-603 and IAEA-C1 from Wostbrock et al. (2020) are used in this correction.

## Sheet: G49634
Kelson, J.R., et al., 2022, Looking upstream with clumped and triple oxygen isotopes of estuarine oyster shells in the early Eocene of California, USA: Geology, v. 50, https://doi.org/10.1130/G49634.1
